# Supplementary material for: Visible-light-promoted sulfenylation of 6-aminouracils under catalyst-free conditions
Source: Royal Society of Chemistry journal article supplement (doi:10.1039/d2nj01941h), 2022-01-01

### Electronic Supplementary Information

#### **Visible-light-promoted sulfenylation of 6-aminouracils under catalyst-free condition**

B. Shriya Saikia, Paran J. Borpatra, Iftakur Rahman, Mohit L. Deb\* and Pranjal K. Baruah\*

Department of Applied Sciences, GUIST, Gauhati University, Guwahati-781014, Assam, India.

E-mail: [mohitdd.deb@gmail.com](mailto:mohitdd.deb@gmail.com); [baruah.pranjal@gmail.com](mailto:baruah.pranjal@gmail.com)

#### **Table of Contents:**

|                                                    |       |
|----------------------------------------------------|-------|
| Glossary.....                                      | 1-2   |
| On-Off mechanistic experiments.....                | 2     |
| Photochemical reaction with TEMPO.....             | 2-3   |
| An image of the photoreactor for the reaction..... | 3     |
| Characterization of the products.....              | 3-9   |
| References.....                                    | 9-10  |
| NMR Spectra of the Products.....                   | 11-39 |

### GLOSSARY

| <b>Sl. No.</b> | <b>Abbrreviation</b>        | <b>Full forms</b>                                         |
|----------------|-----------------------------|-----------------------------------------------------------|
| 1.             | BHT                         | Butylated hydroxytoluene                                  |
| 2.             | Br                          | Bromo                                                     |
| 3.             | °C                          | Degree centigrade                                         |
| 4.             | CDCl <sub>3</sub>           | Deuterated chloroform                                     |
| 5.             | CFL                         | Compact Fluorescent Light                                 |
| 6.             | Cl                          | Chloro                                                    |
| 7.             | cm <sup>-1</sup>            | Centimeter inverse                                        |
| 8.             | δ                           | Chemical shifts                                           |
| 9.             | DMF                         | Dimethylformamide                                         |
| 10.            | DMS                         | dimethylsulfide                                           |
| 11.            | DMSO                        | Dimethyl sulfoxide                                        |
| 12.            | DMSO- <i>d</i> <sub>6</sub> | Dimethyl sulfoxide-deuterated                             |
| 13.            | DNA                         | Deoxyribonucleic acid                                     |
| 14.            | ESI-HRMS                    | High resolution electrospray ionization mass spectrometry |
| 15.            | eq.                         | Equivalent                                                |
| 16.            | F                           | Floro                                                     |
| 17.            | FT-IR                       | Fourier Transform Infrared Spectroscopy                   |
| 18.            | g                           | Gram                                                      |
| 19.            | h                           | Hour                                                      |
| 20.            | HIV                         | Human immunodeficiency virus                              |
| 21.            | Hz                          | Hertz                                                     |
| 22.            | I <sub>2</sub>              | Iodine                                                    |
| 23.            | I.R.                        | Infrared                                                  |
| 24.            | <i>J</i>                    | Coupling constants                                        |
| 25.            | KBr                         | Potassium bromide                                         |
| 26.            | KMnO <sub>4</sub>           | Potassium permanganate                                    |
| 27.            | LC/MS                       | Liquid Chromatography/mass spectrometry                   |
| 28.            | LED                         | light-emitting diode                                      |
| 29.            | Me                          | Methyl                                                    |
| 30.            | MHz                         | Megahertz                                                 |
| 31.            | mg                          | Milligram                                                 |
| 32.            | mmol                        | Millimole                                                 |

|     |                |                                             |
|-----|----------------|---------------------------------------------|
| 33. | mL             | Milliliter                                  |
| 34. | M.P.           | Melting point                               |
| 35. | MW             | Microwave                                   |
| 36. | NCS            | N-chlorosuccinimide                         |
| 37. | nm             | Nanometer                                   |
| 38. | NMR            | Nuclear Magnetic Resonance                  |
| 39. | O <sub>2</sub> | Oxygen                                      |
| 40. | Ph             | Phenyl                                      |
| 41. | ppm            | Parts per million                           |
| 42. | Pr             | Propyl                                      |
| 43. | Q-TOF          | Quadrupole Time-of-Flight                   |
| 44. | RNA            | Ribonucleic acid                            |
| 45. | r.t.           | Room temperature                            |
| 46. | TEMPO          | (2,2,6,6-tetramethylpiperidin-1-yl)oxidanyl |
| 47. | TLC            | Thin layer chromatography                   |
| 48. | TMS            | Tetramethylsilane                           |
| 49. | UV             | Ultraviolet                                 |
| 50. | W              | Watt                                        |

### On-Off mechanistic experiments

In a round bottom flask equipped with a stir bar were added the compound **1** (1 mmol), **2** (1 mmol) and DMSO (2 mL) as solvent. The reaction was carried out under CFL (20 W) irradiation in open air for 2 h. Then, the reaction mixture was placed under dark conditions for another 0.5 h. The procedure was repeated for 10 h in total. Between the intervals, the reaction was monitored to calculate the reaction yield.

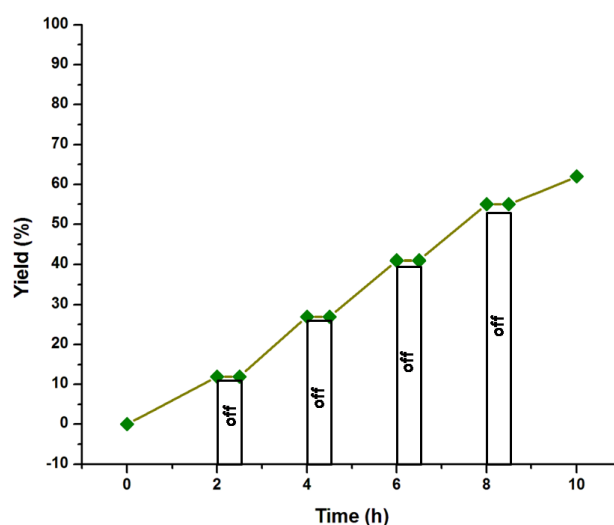

**Figure.** The “On/Off” experiment showing the effect of visible light on the reaction

### Control reaction with TEMPO

To a small round bottom flask equipped with a stir bar were added the compound **1** (1 mmol), **2** (1 mmol), TEMPO (1.5 eq.) and DMSO (2 mL) as solvent. The reaction was carried out under CFL (20 W) irradiation in open air for 8 h. The reaction mixture was analyzed by High resolution mass spectrometry (HRMS) in which the presence of 2,2,6,6-tetramethyl-1-((phenylthio)oxy)piperidine was observed ( $[M+H]^+ = 266.1572$ ), suggesting the formation of thiyl radical in the reaction. The spectrum recorded is presented below.

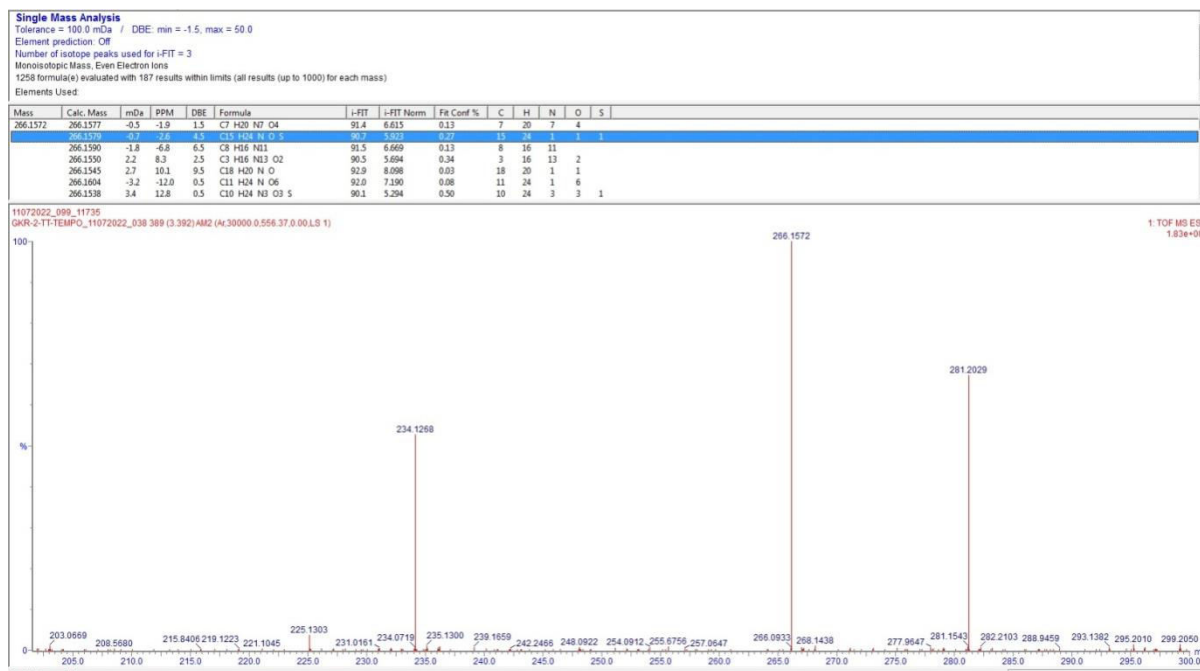

Figure. The adduct formed between thyl radical and TEMPO identified by HRMS

### An image of the photoreactor for the reaction

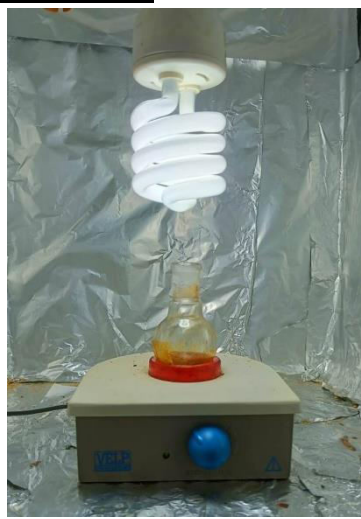

Figure. 20 W CFL bulb utilized for the photochemical reaction

### Characterization of the products

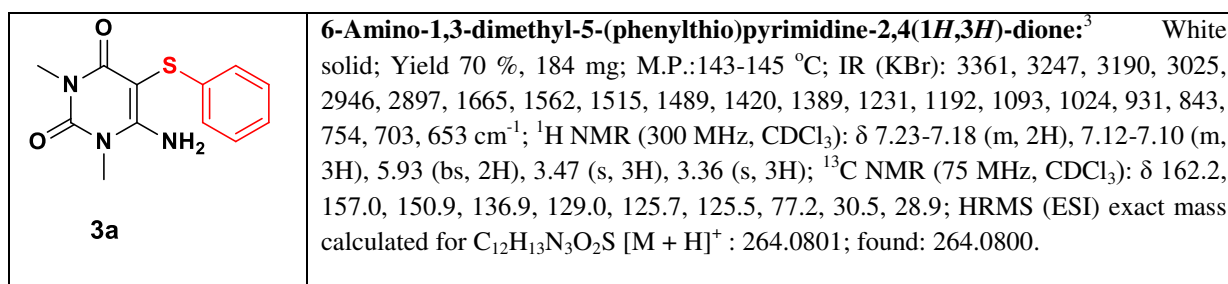

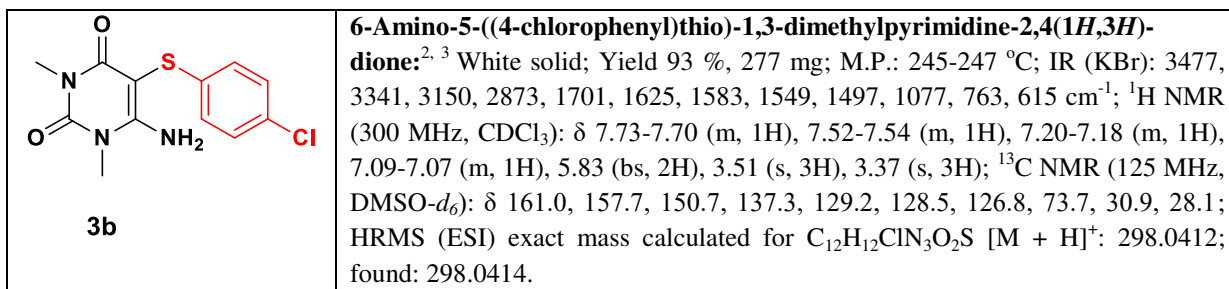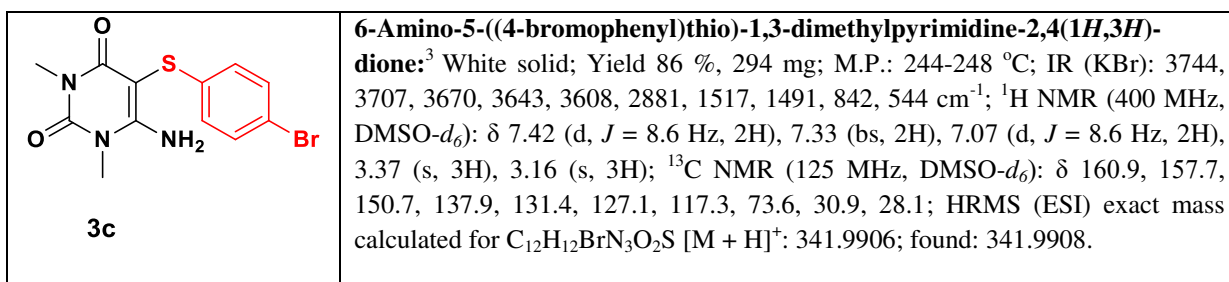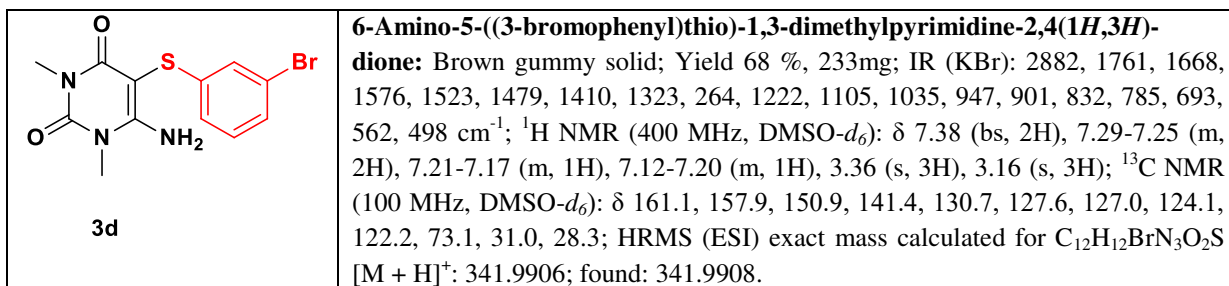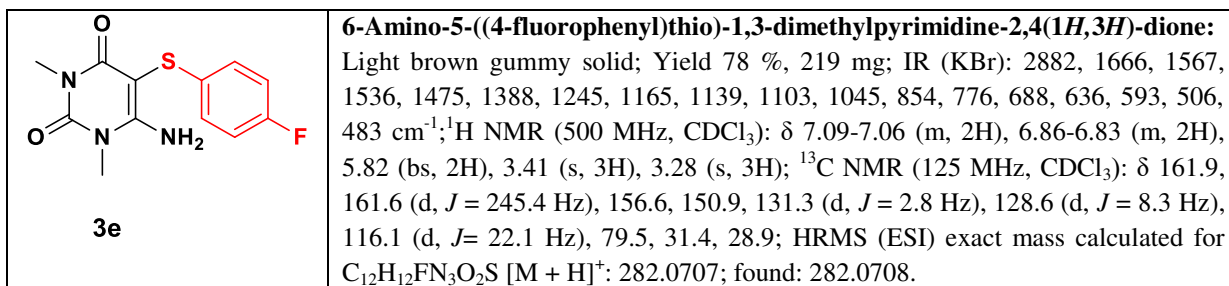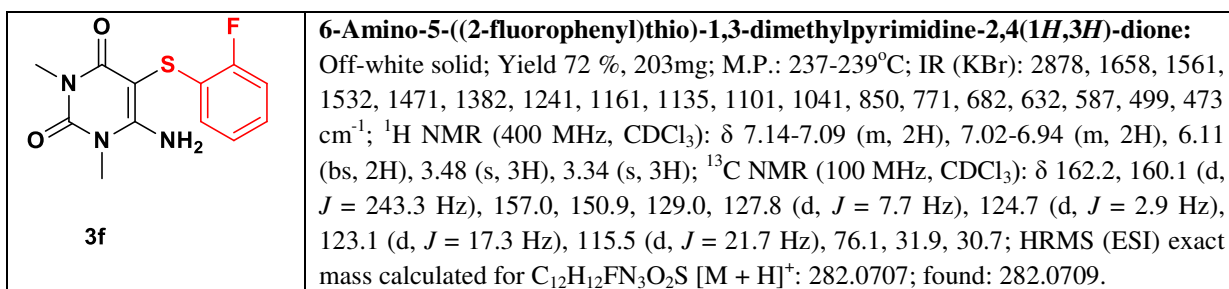

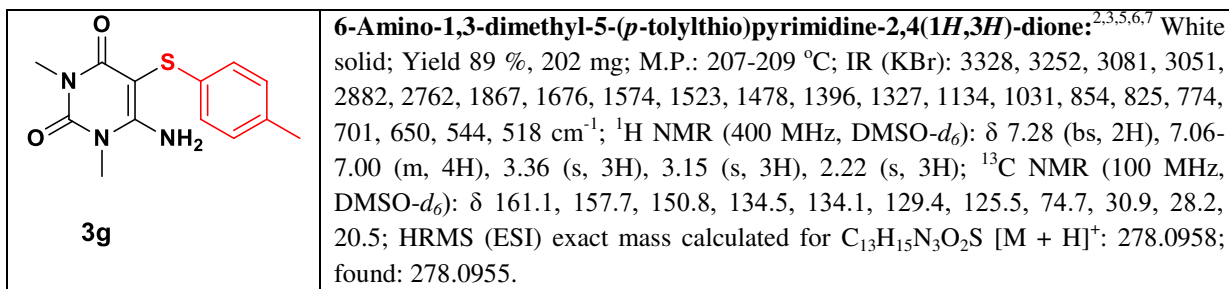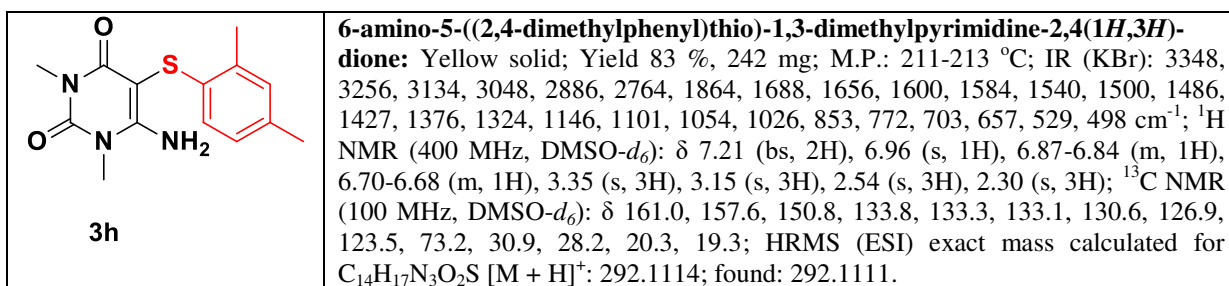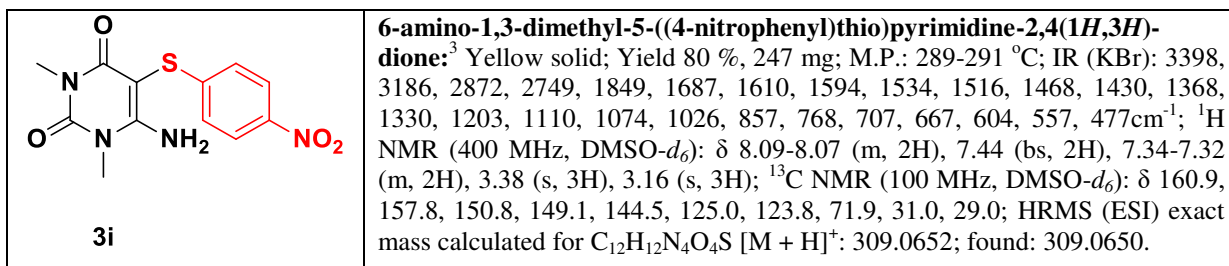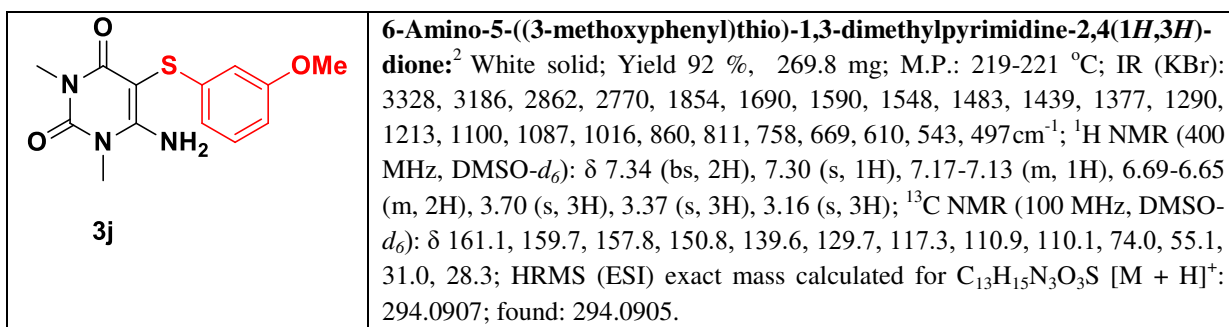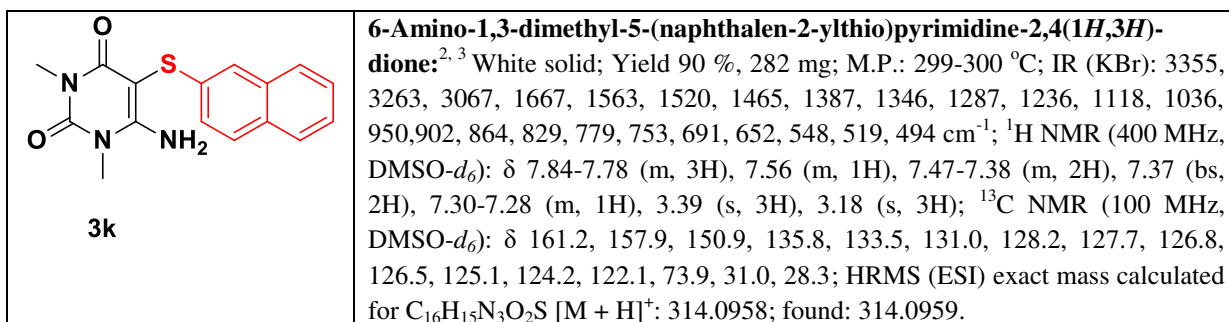

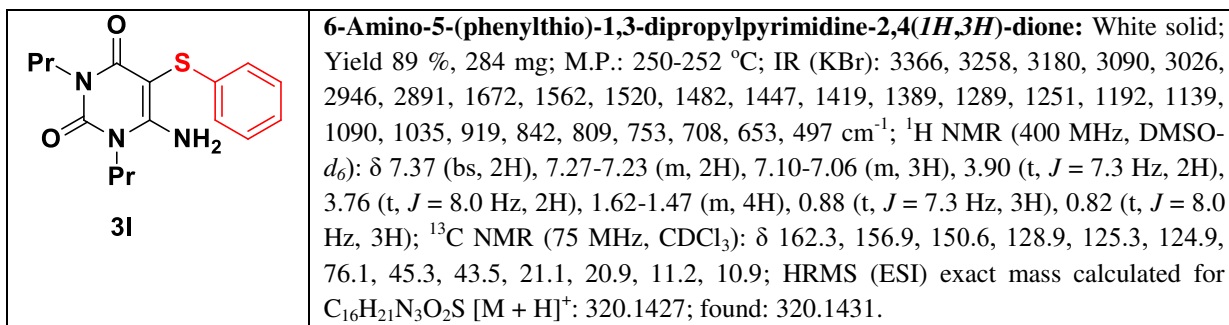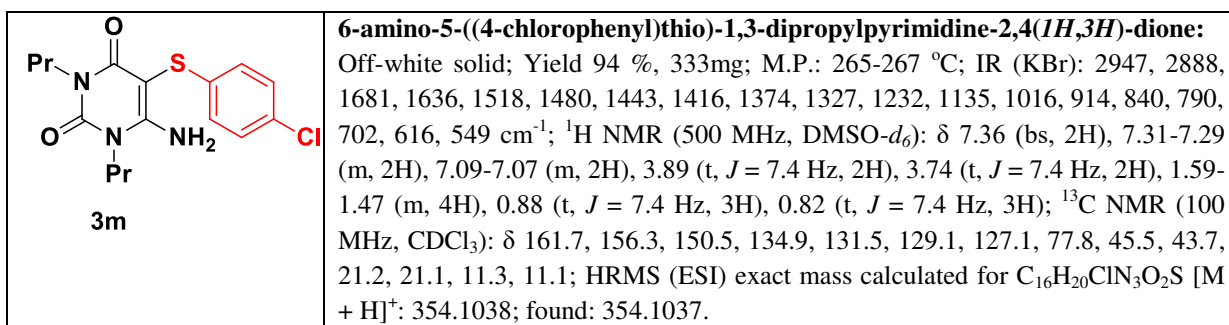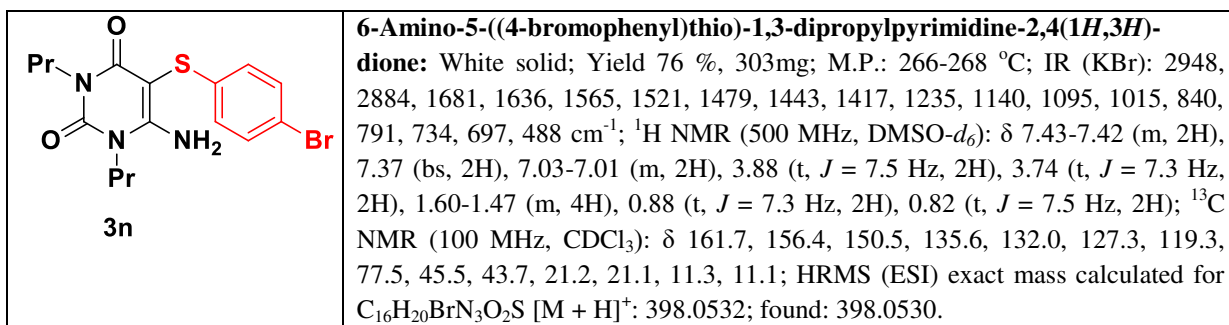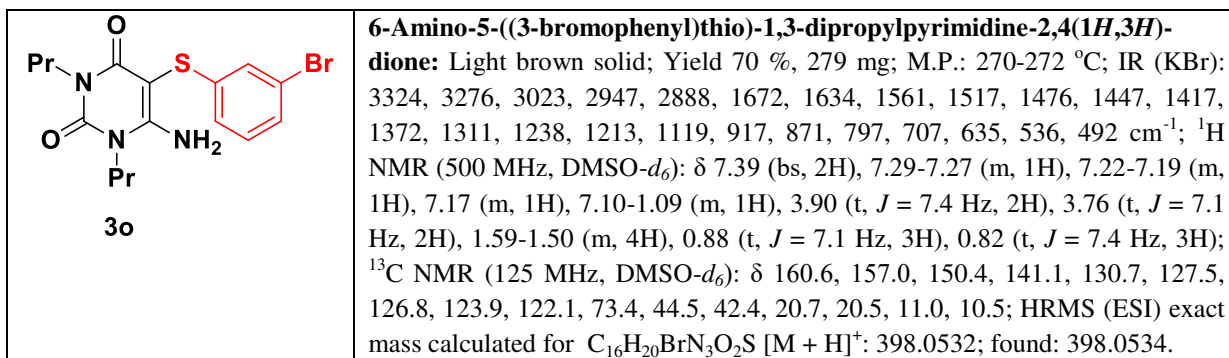

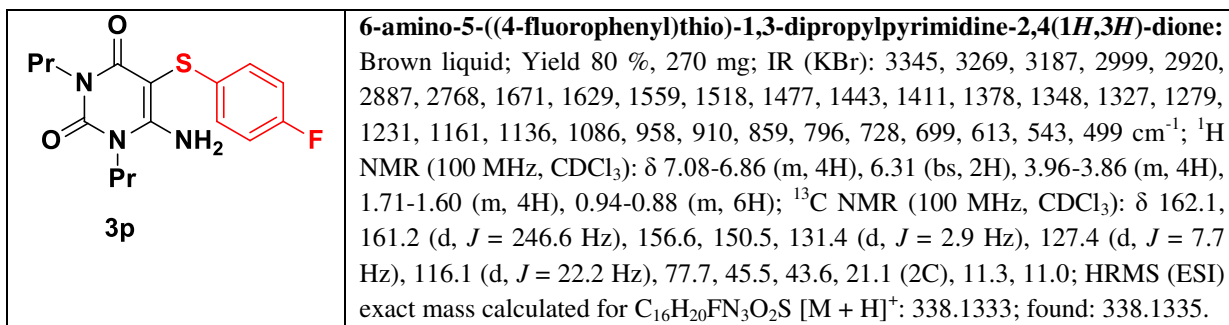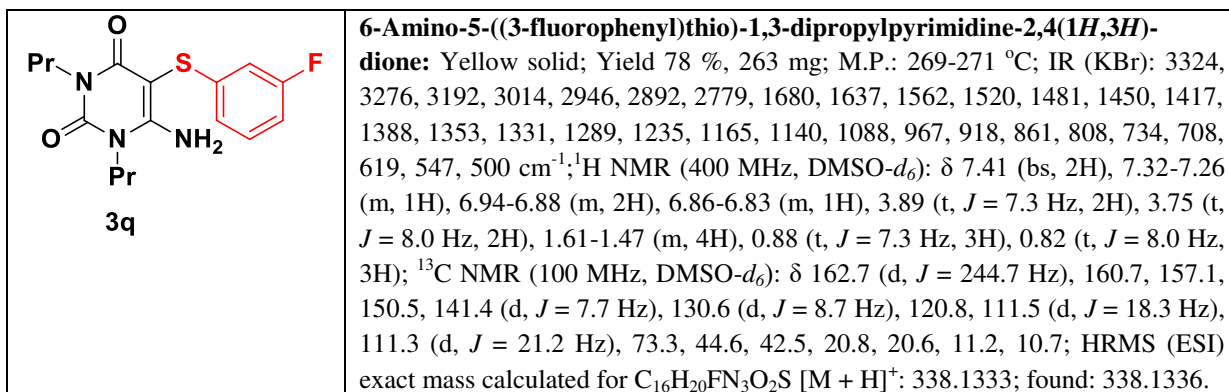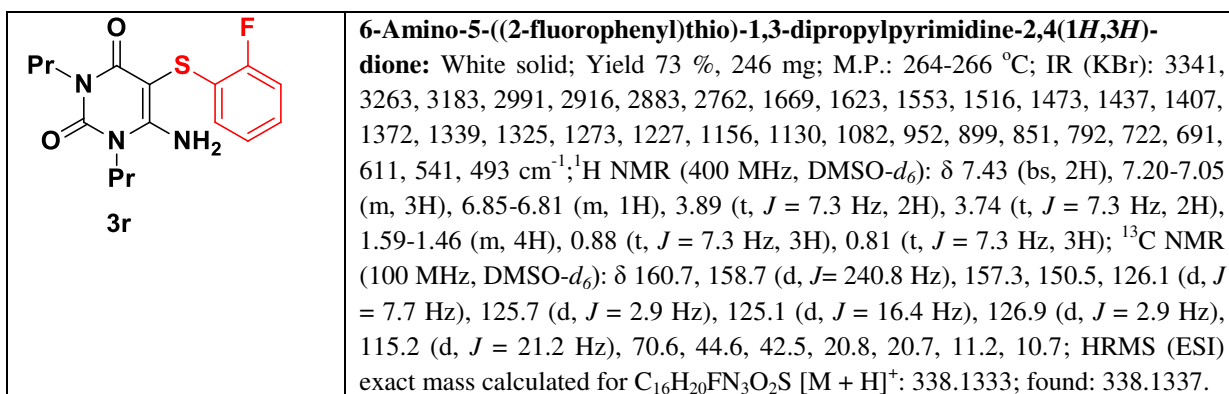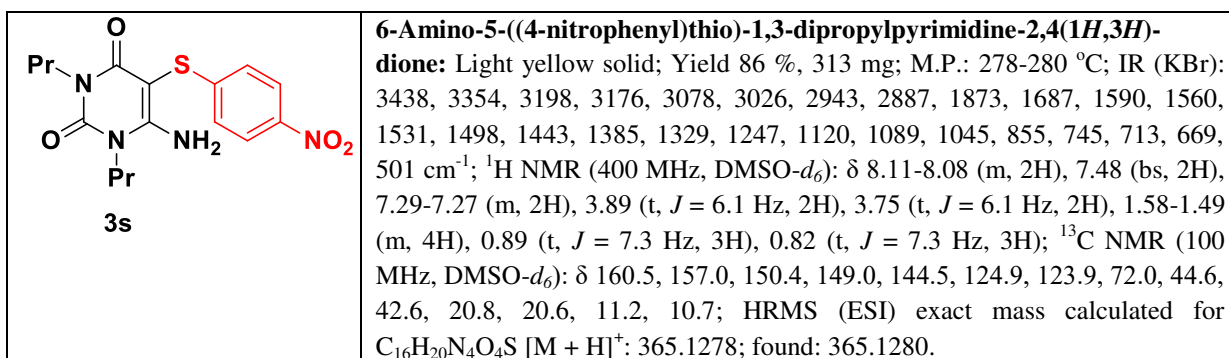

|                                                                                                                                |                                                                                                                                                                                                                                                                                                                                                                                                                                                                                                                                                                                                                                                                                                                                                                                                                                                                                                                                                                      |
|--------------------------------------------------------------------------------------------------------------------------------|----------------------------------------------------------------------------------------------------------------------------------------------------------------------------------------------------------------------------------------------------------------------------------------------------------------------------------------------------------------------------------------------------------------------------------------------------------------------------------------------------------------------------------------------------------------------------------------------------------------------------------------------------------------------------------------------------------------------------------------------------------------------------------------------------------------------------------------------------------------------------------------------------------------------------------------------------------------------|
| 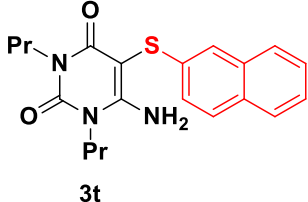 <p style="text-align: center;"><b>3t</b></p> | <p><b>6-Amino-5-(naphthalen-2-ylthio)-1,3-dipropylpyrimidine-2,4(1H,3H)-dione:</b> Brown gummy liquid; Yield 92 %, 340 mg; IR (KBr): 3369, 3024, 2887, 2455, 1930, 1867, 1565, 1522, 1478, 1421, 1390, 1314, 1244, 1163, 1101, 1042, 985, 921, 868, 837, 792, 712, 692, 657, 582, 494 <math>\text{cm}^{-1}</math>; <math>^1\text{H}</math> NMR (500 MHz, <math>\text{CDCl}_3</math>): <math>\delta</math> 7.57-7.55 (m, 1H), 7.47-7.43 (m, 2H), 7.30-7.24 (m, 3H), 6.99-6.98 (m, 1H), 6.28 (bs, 2H), 3.78 (m, 4H), 1.56-1.52 (m, 4H), 0.81-0.71 (m, 6H); <math>^{13}\text{C}</math> NMR (125 MHz, <math>\text{CDCl}_3</math>): <math>\delta</math> 162.2, 156.8, 150.6, 133.9, 133.7, 131.6, 128.6, 127.7, 126.8, 126.5, 125.3, 124.0, 123.1, 77.1, 45.4, 43.6, 21.1 (2C), 11.2, 10.8; HRMS (ESI) exact mass calculated for <math>\text{C}_{20}\text{H}_{23}\text{N}_3\text{O}_2\text{S}</math> <math>[\text{M} + \text{H}]^+</math>: 370.1584; found: 370.1582.</p> |
|--------------------------------------------------------------------------------------------------------------------------------|----------------------------------------------------------------------------------------------------------------------------------------------------------------------------------------------------------------------------------------------------------------------------------------------------------------------------------------------------------------------------------------------------------------------------------------------------------------------------------------------------------------------------------------------------------------------------------------------------------------------------------------------------------------------------------------------------------------------------------------------------------------------------------------------------------------------------------------------------------------------------------------------------------------------------------------------------------------------|

|                                                                                                                                |                                                                                                                                                                                                                                                                                                                                                                                                                                                                                                                                                                                                                                                                                                                                                                    |
|--------------------------------------------------------------------------------------------------------------------------------|--------------------------------------------------------------------------------------------------------------------------------------------------------------------------------------------------------------------------------------------------------------------------------------------------------------------------------------------------------------------------------------------------------------------------------------------------------------------------------------------------------------------------------------------------------------------------------------------------------------------------------------------------------------------------------------------------------------------------------------------------------------------|
| 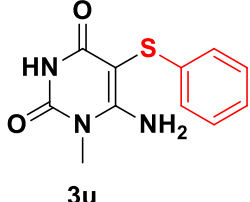 <p style="text-align: center;"><b>3u</b></p> | <p><b>6-Amino-1-methyl-5-(phenylthio)pyrimidine-2,4(1H,3H)-dione:</b><sup>7</sup> Off-white solid; Yield 63 %, 157 mg; M.P.: 278-280 °C; IR (KBr): 3391, 3301, 3121, 2965, 2883, 1717, 1612, 1553, 1491, 1417, 1011, 845, 751, 631 <math>\text{cm}^{-1}</math>; <math>^1\text{H}</math> NMR (500 MHz, <math>\text{DMSO}-d_6</math>): <math>\delta</math> 10.8 (bs, 1H), 7.27-7.23 (m, 4H), 7.10-7.09 (m, 3H), 3.30 (s, 3H); <math>^{13}\text{C}</math> NMR (125 MHz, <math>\text{DMSO}-d_6</math>): <math>\delta</math> 161.5, 159.0, 150.3, 138.1, 128.7, 124.9, 124.6, 74.0, 29.8; HRMS (ESI) exact mass calculated for <math>\text{C}_{11}\text{H}_{11}\text{N}_3\text{O}_2\text{S}</math> <math>[\text{M} + \text{H}]^+</math>: 250.0645; found: 250.0642.</p> |
|--------------------------------------------------------------------------------------------------------------------------------|--------------------------------------------------------------------------------------------------------------------------------------------------------------------------------------------------------------------------------------------------------------------------------------------------------------------------------------------------------------------------------------------------------------------------------------------------------------------------------------------------------------------------------------------------------------------------------------------------------------------------------------------------------------------------------------------------------------------------------------------------------------------|

|                                                                                                                                 |                                                                                                                                                                                                                                                                                                                                                                                                                                                                                                                                                                                                                                                                                                                                                                                            |
|---------------------------------------------------------------------------------------------------------------------------------|--------------------------------------------------------------------------------------------------------------------------------------------------------------------------------------------------------------------------------------------------------------------------------------------------------------------------------------------------------------------------------------------------------------------------------------------------------------------------------------------------------------------------------------------------------------------------------------------------------------------------------------------------------------------------------------------------------------------------------------------------------------------------------------------|
| 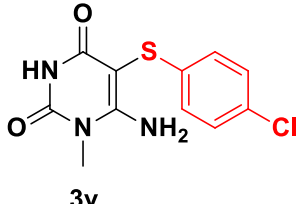 <p style="text-align: center;"><b>3v</b></p> | <p><b>6-Amino-5-((4-chlorophenyl)thio)-1-methylpyrimidine-2,4(1H,3H)-dione:</b><sup>2</sup> White solid; Yield 67 %, 190 mg; M.P.: 293-295°C; IR (KBr): 2882, 1682, 1568, 1531, 1483, 1404, 1213, 1105, 1032, 846, 777, 516 <math>\text{cm}^{-1}</math>; <math>^1\text{H}</math> NMR (400 MHz, <math>\text{DMSO}-d_6</math>): <math>\delta</math> 11.1 (bs, 1H), 7.81 (bs, 2H), 7.65-7.63 (m, 2H), 7.62-7.59 (m, 2H), 3.16 (s, 3H); <math>^{13}\text{C}</math> NMR (100 MHz, <math>\text{DMSO}-d_6</math>): <math>\delta</math> 162.4, 156.6, 151.2, 147.7, 136.2, 129.1, 128.7, 126.6, 126.2, 75.1, 31.4; HRMS (ESI) exact mass calculated for <math>\text{C}_{11}\text{H}_{10}\text{ClN}_3\text{O}_2\text{S}</math> <math>[\text{M} + \text{H}]^+</math>: 284.0255; found: 284.0258.</p> |
|---------------------------------------------------------------------------------------------------------------------------------|--------------------------------------------------------------------------------------------------------------------------------------------------------------------------------------------------------------------------------------------------------------------------------------------------------------------------------------------------------------------------------------------------------------------------------------------------------------------------------------------------------------------------------------------------------------------------------------------------------------------------------------------------------------------------------------------------------------------------------------------------------------------------------------------|

|                                                                                                                                  |                                                                                                                                                                                                                                                                                                                                                                                                                                                                                                                                                                                                                                                                                                                                                                                                                                                                                                                               |
|----------------------------------------------------------------------------------------------------------------------------------|-------------------------------------------------------------------------------------------------------------------------------------------------------------------------------------------------------------------------------------------------------------------------------------------------------------------------------------------------------------------------------------------------------------------------------------------------------------------------------------------------------------------------------------------------------------------------------------------------------------------------------------------------------------------------------------------------------------------------------------------------------------------------------------------------------------------------------------------------------------------------------------------------------------------------------|
| 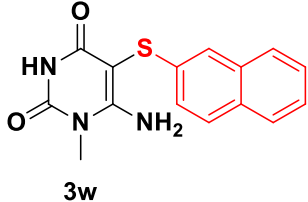 <p style="text-align: center;"><b>3w</b></p> | <p><b>6-Amino-1-methyl-5-(naphthalen-2-ylthio)pyrimidine-2,4(1H,3H)-dione:</b><sup>2</sup> Off-white solid; Yield 66 %, 198 mg; M.P.: 297-299 °C; IR (KBr): 2881, 1682, 1566, 1525, 1478, 1417, 1323, 1252, 1116, 1133, 1088, 1045, 873, 843, 785, 717, 691, 667, 557, 527, 491 <math>\text{cm}^{-1}</math>; <math>^1\text{H}</math> NMR (500 MHz, <math>\text{DMSO}-d_6</math>): <math>\delta</math> 11.05 (bs, 1H), 8.28 (m, 1H), 8.10-8.08 (m, 1H), 8.06-8.05 (m, 1H), 8.00-7.98 (m, 1H), 7.82 (bs, 2H), 7.63-7.61 (m, 3H), 3.15 (s, 3H); <math>^{13}\text{C}</math> NMR (125 MHz, <math>\text{DMSO}-d_6</math>): <math>\delta</math> 159.7, 156.1, 150.0, 142.2, 133.6, 132.2, 129.3, 128.4, 127.8, 127.6, 127.2, 123.9, 120.9, 85.6, 28.2; HRMS (ESI) exact mass calculated for <math>\text{C}_{15}\text{H}_{13}\text{N}_3\text{O}_2\text{S}</math> <math>[\text{M} + \text{H}]^+</math>: 300.0801; found: 300.0803.</p> |
|----------------------------------------------------------------------------------------------------------------------------------|-------------------------------------------------------------------------------------------------------------------------------------------------------------------------------------------------------------------------------------------------------------------------------------------------------------------------------------------------------------------------------------------------------------------------------------------------------------------------------------------------------------------------------------------------------------------------------------------------------------------------------------------------------------------------------------------------------------------------------------------------------------------------------------------------------------------------------------------------------------------------------------------------------------------------------|

|                                                                                                                                  |                                                                                                                                                                                                                                                                                                                                                                                                                                                                                                                                                                                                                                                                                                                                                                         |
|----------------------------------------------------------------------------------------------------------------------------------|-------------------------------------------------------------------------------------------------------------------------------------------------------------------------------------------------------------------------------------------------------------------------------------------------------------------------------------------------------------------------------------------------------------------------------------------------------------------------------------------------------------------------------------------------------------------------------------------------------------------------------------------------------------------------------------------------------------------------------------------------------------------------|
| 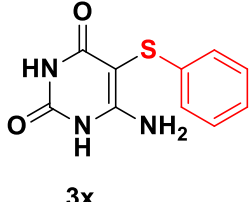 <p style="text-align: center;"><b>3x</b></p> | <p><b>6-Amino-5-(phenylthio)pyrimidine-2,4(1H,3H)-dione:</b><sup>7</sup> White solid; Yield 59 %, 139 mg; M.P.: &gt;300°C; IR (KBr): 3390, 3408, 3283, 2958, 2879, 2787, 1713, 1627, 1608, 1558, 1482, 1400, 1006, 843, 749, 627 <math>\text{cm}^{-1}</math>; <math>^1\text{H}</math> NMR (400 MHz, <math>\text{DMSO}-d_6</math>): <math>\delta</math> 10.6 (bs, 1H), 10.4 (bs, 1H), 7.27-7.23 (m, 2H), 7.11-7.06 (m, 3H), 6.64 (bs, 2H); <math>^{13}\text{C}</math> NMR (100 MHz, <math>\text{DMSO}-d_6</math>): <math>\delta</math> 163.2, 158.0, 149.9, 138.3, 128.9, 124.9, 124.7, 73.2; HRMS (ESI) exact mass calculated for <math>\text{C}_{10}\text{H}_9\text{N}_3\text{O}_2\text{S}</math> <math>[\text{M} + \text{H}]^+</math>: 236.0488; found: 236.0485.</p> |
|----------------------------------------------------------------------------------------------------------------------------------|-------------------------------------------------------------------------------------------------------------------------------------------------------------------------------------------------------------------------------------------------------------------------------------------------------------------------------------------------------------------------------------------------------------------------------------------------------------------------------------------------------------------------------------------------------------------------------------------------------------------------------------------------------------------------------------------------------------------------------------------------------------------------|



|                                                                                                                                  |                                                                                                                                                                                                                                                                                                                                                                                                                                                                                                                                                                                                                                   |
|----------------------------------------------------------------------------------------------------------------------------------|-----------------------------------------------------------------------------------------------------------------------------------------------------------------------------------------------------------------------------------------------------------------------------------------------------------------------------------------------------------------------------------------------------------------------------------------------------------------------------------------------------------------------------------------------------------------------------------------------------------------------------------|
| 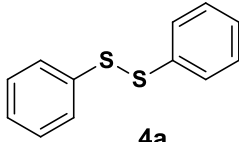 <p style="text-align: center;"><b>4a</b></p>   | <p><b>1,2-Diphenyldisulfane:</b><sup>1,4</sup> White solid; Yield 78%, 170 mg; M.P.:58-59 °C; IR (KBr): 3876, 3800, 3653, 3051, 2872, 2322, 1600, 1569, 1465, 1424, 1268, 1157, 1124, 754, 690, 510, 450 cm<sup>-1</sup>; <sup>1</sup>H NMR (500 MHz, DMSO-<i>d</i><sub>6</sub>): δ 7.51-7.50 (m, 4H), 7.38-7.35 (m, 4H), 7.29-7.26 (m, 2H); <sup>13</sup>C NMR (125 MHz, DMSO-<i>d</i><sub>6</sub>): δ 135.9, 129.6, 127.7, 127.2; HRMS (ESI) exact mass calculated for C<sub>12</sub>H<sub>10</sub>S<sub>2</sub>[M + H]<sup>+</sup> : 219.0297; found: 219.0295.</p>                                                            |
|  <p style="text-align: center;"><b>4b</b></p>   | <p><b>1,2-Bis(4-chlorophenyl)disulfane:</b><sup>1,4</sup> White solid; Yield 76%, 218 mg; M.P.:68-70 °C; IR (KBr): 2880, 1577, 1487, 1400, 1302, 1130, 1017, 961, 848, 751, 701, 560, 524 cm<sup>-1</sup>; <sup>1</sup>H NMR (500 MHz, DMSO-<i>d</i><sub>6</sub>): δ 7.52-7.50 (m, 4H), 7.44-7.41 (m, 4H); <sup>13</sup>C NMR (125 MHz, DMSO-<i>d</i><sub>6</sub>): δ 134.6, 132.7, 129.6, 129.3; HRMS (ESI) exact mass calculated for C<sub>12</sub>H<sub>8</sub>Cl<sub>2</sub>S<sub>2</sub>[M + H]<sup>+</sup> : 286.9517; found: 286.9514.</p>                                                                                 |
|  <p style="text-align: center;"><b>4c</b></p>   | <p><b>1,2-Bis(4-bromophenyl)disulfane:</b><sup>4</sup> White solid; Yield 80%, 301mg; M.P.:90-93 °C; IR (KBr): 2876, 1574, 1479, 1394, 1301, 1131, 1095, 1013, 841, 730, 698, 509, 482 cm<sup>-1</sup>; <sup>1</sup>H NMR (400 MHz, CDCl<sub>3</sub>): δ 7.42-7.39 (m, 4H), 7.33-7.30 (m, 4H); <sup>13</sup>C NMR (100 MHz, CDCl<sub>3</sub>): δ 135.6, 132.1, 129.3, 121.5; HRMS (ESI) exact mass calculated for C<sub>12</sub>H<sub>8</sub>Br<sub>2</sub>S<sub>2</sub> [M + H]<sup>+</sup> : 374.8507; found: 374.8504.</p>                                                                                                     |
|  <p style="text-align: center;"><b>4d</b></p> | <p><b>1,2-Bis(4-fluorophenyl)disulfane:</b> Off-white solid; Yield 78 %, 198 mg; M.P.:74-76°C; IR (KBr): 3880, 3816, 3683, 2882, 2328, 1606, 1535, 1414, 1278, 1171, 1127, 854, 667, 642, 444 cm<sup>-1</sup>; <sup>1</sup>H NMR (400 MHz, CDCl<sub>3</sub>): δ 7.45-7.41 (m, 4H), 7.02-6.97 (m, 4H); <sup>13</sup>C NMR (100 MHz, CDCl<sub>3</sub>): δ 162.6 (d, <i>J</i> = 248.5 Hz), 132.1 (d, <i>J</i> = 2.9 Hz), 131.2 (d, <i>J</i> = 8.7 Hz), 116.4 (d, <i>J</i> = 22.2 Hz); HRMS (ESI) exact mass calculated for C<sub>12</sub>H<sub>8</sub>F<sub>2</sub>S<sub>2</sub>[M + H]<sup>+</sup> : 255.0108; found: 255.0105.</p> |
|  <p style="text-align: center;"><b>4e</b></p> | <p><b>1,2-Di(naphthalen-1-yl)disulfane:</b><sup>1,4</sup> White solid; Yield 82 %, 261 mg; M.P.:138-140°C; IR (KBr): 2878, 1586, 1500, 1467, 1409, 1383, 1271, 1121, 1088, 1015, 853, 839, 775, 707, 671, 537, 517, 471 cm<sup>-1</sup>; <sup>1</sup>H NMR (300 MHz, CDCl<sub>3</sub>): δ 7.98 (m, 2H), 7.80-7.72 (m, 6H), 7.63-7.60 (m, 2H), 7.46-7.45 (m, 4H); <sup>13</sup>C NMR (125 MHz, CDCl<sub>3</sub>): δ 134.1, 133.4, 132.4, 128.9, 127.7, 127.4, 126.7, 126.4, 126.2, 125.5; HRMS (ESI) exact mass calculated for C<sub>20</sub>H<sub>14</sub>S<sub>2</sub>[M + H]<sup>+</sup> : 319.0610; found: 319.0607.</p>       |

#### References:

1. J. L. G. Ruano, A. Alejandro Parra, J. Alemán, *Green Chem.*, 2008, **10**, 706.
2. G. Khalili, *Mol. Divers.*, 2016, **20**, 963.
3. A. Jana, A. K. Panday, R. Mishra, T. Parvin and L. H. Choudhury, *ChemistrySelect*, 2017, **2**, 9420.

4. D. H. Dethé, A. Srivastava, B. Dherange and B. V. Kumar, *Adv. Synth. Catal.*, 2018, **360**,3020.
5. D. Beukeaw, M. Noikham and S. Yotphan, *Tetrahedron*, 2019, **75**,130537.
6. X.-D. Li, Y.-T. Gao, Y.-J. Sun, X.-Y. Jin, D. Wang, L. Liu, L. Cheng, *Org. Lett.*, 2019, **21**, 6643.
7. J. Devi, N. Saikia, G. Choudhury and D. C. Deka, *Tetrahedron Lett.*, 2021, **65**, 152753.

### <sup>1</sup>H NMR 3a

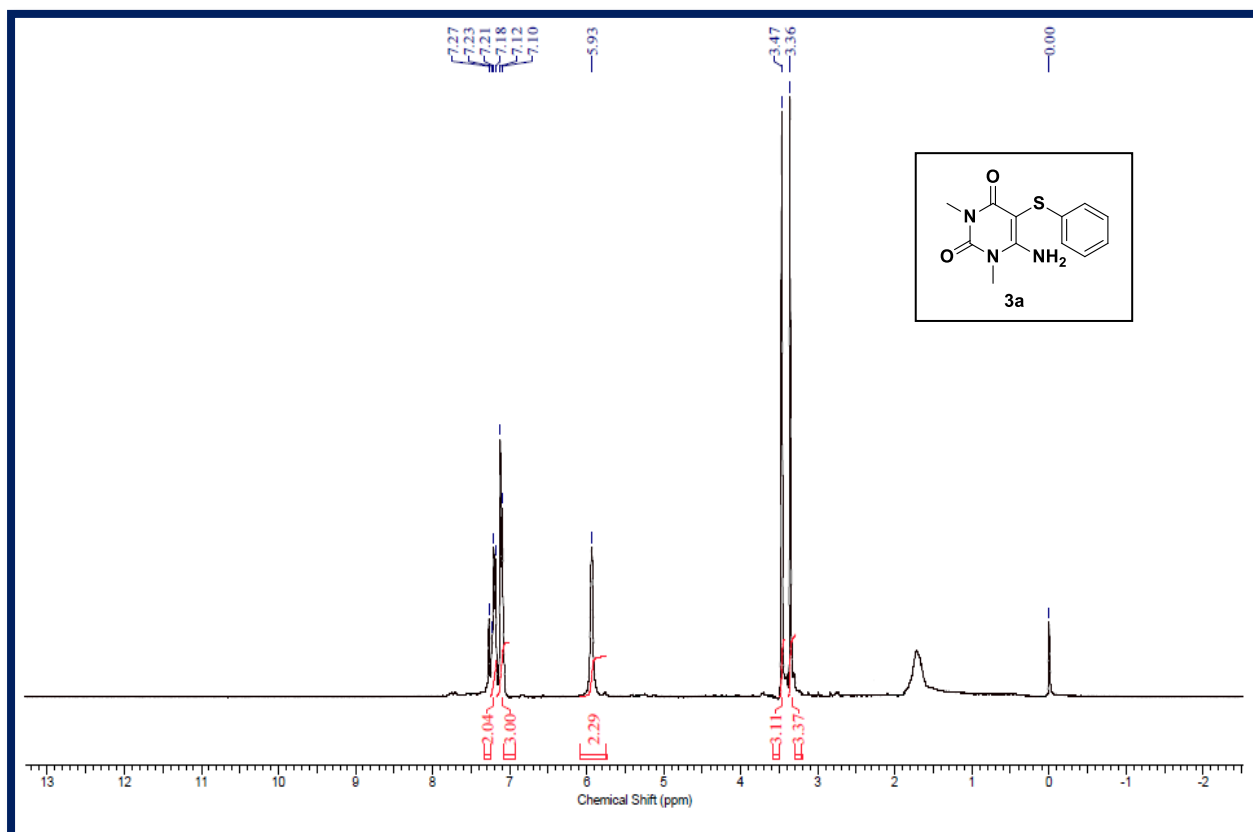

### <sup>13</sup>C NMR 3a

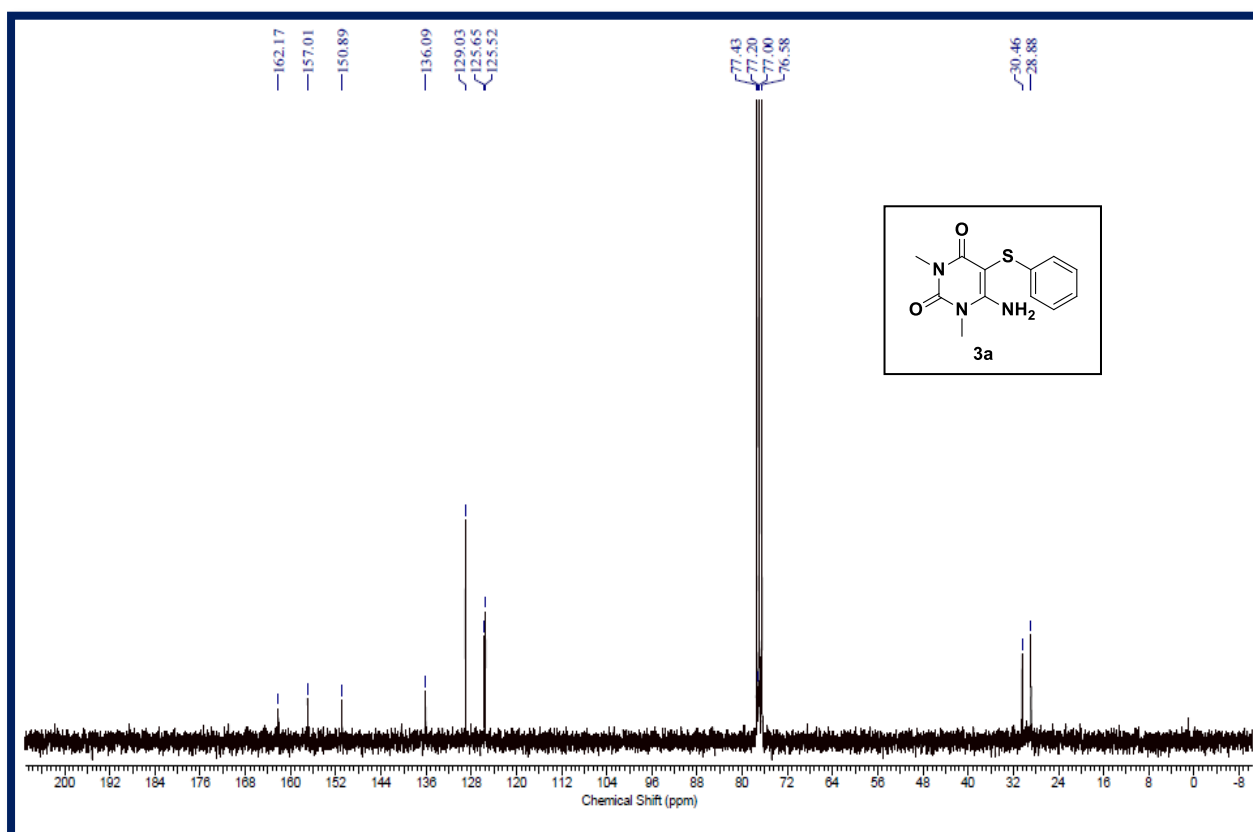



### <sup>1</sup>H NMR 3c

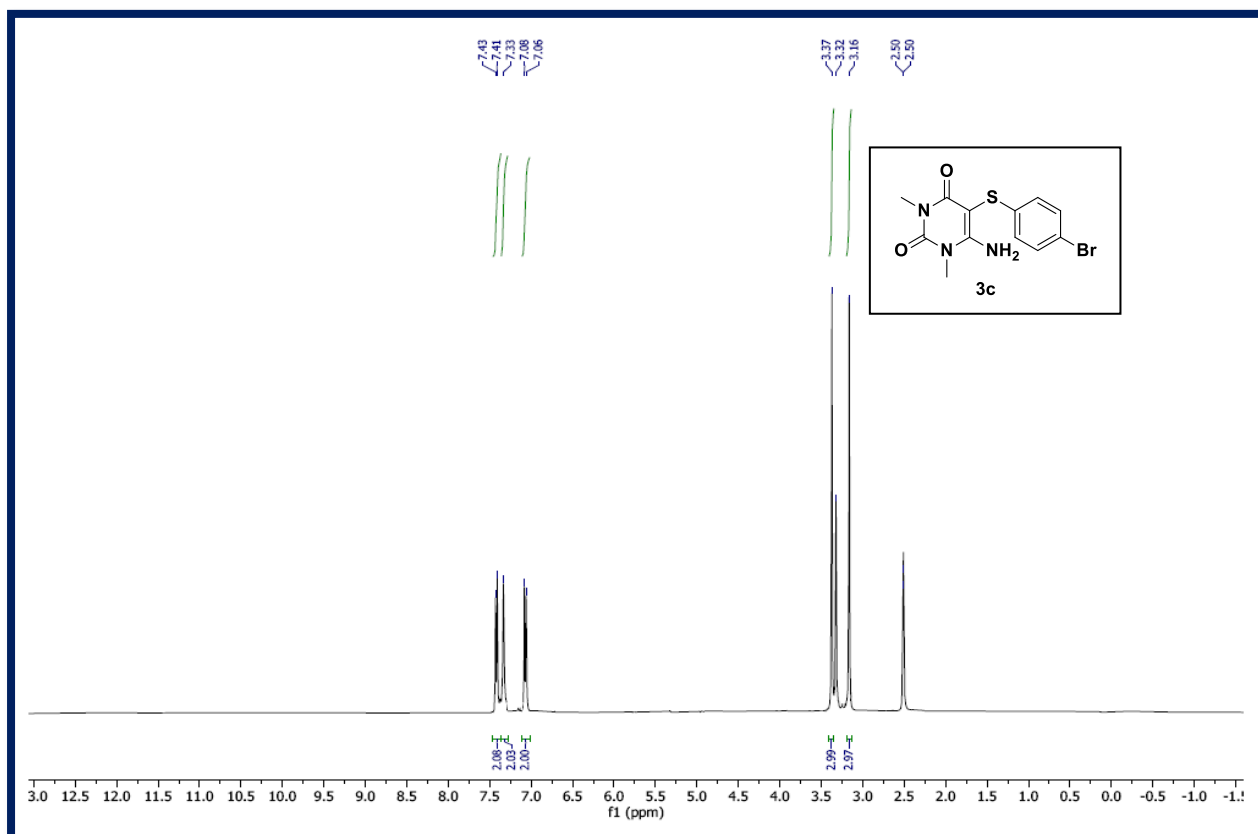

### <sup>13</sup>C NMR 3c

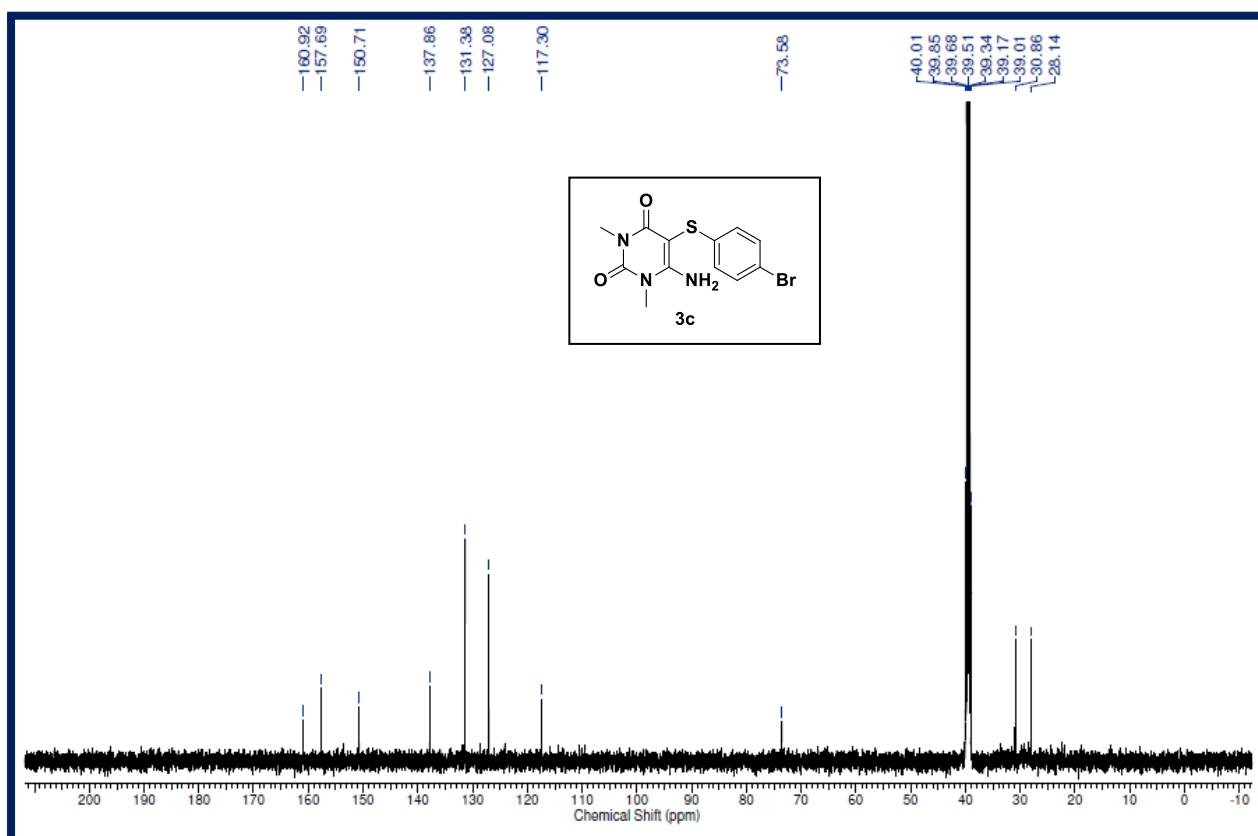

### <sup>1</sup>H NMR 3d

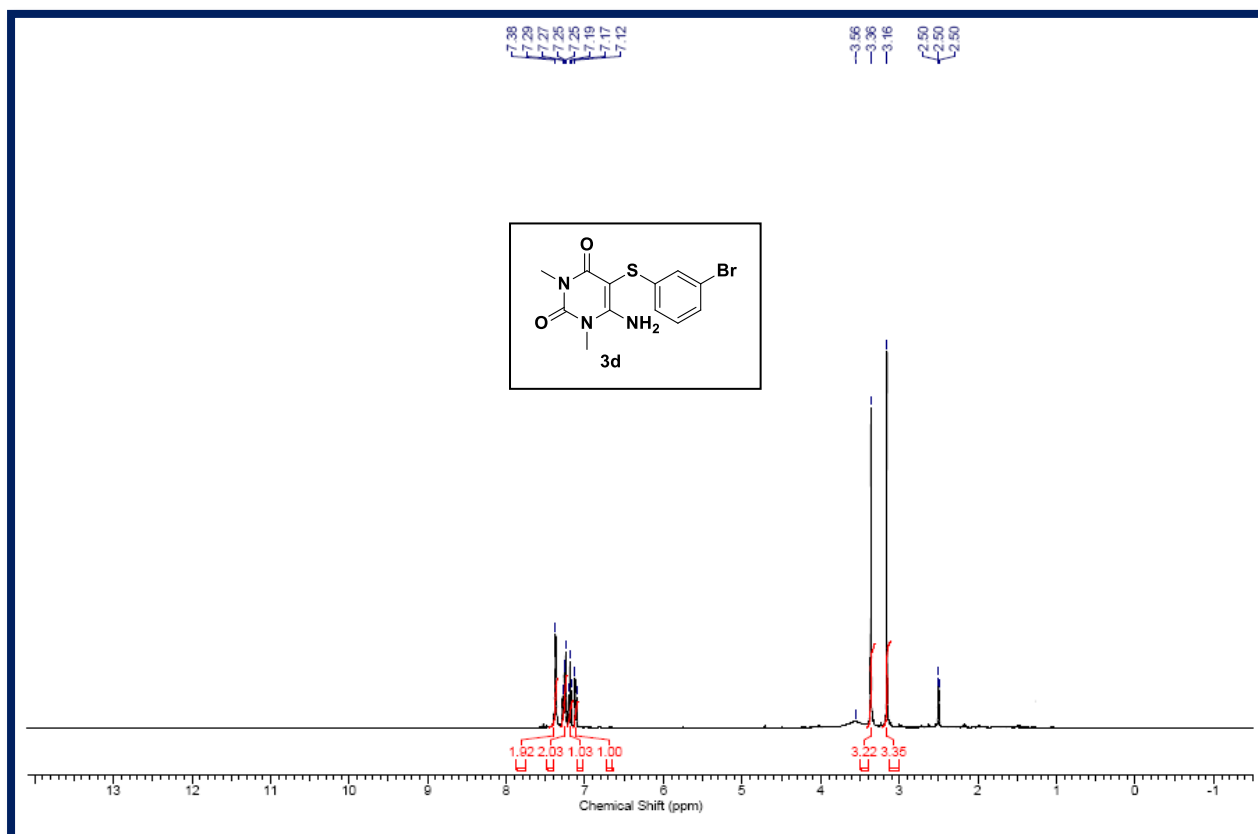

### <sup>13</sup>C NMR 3d

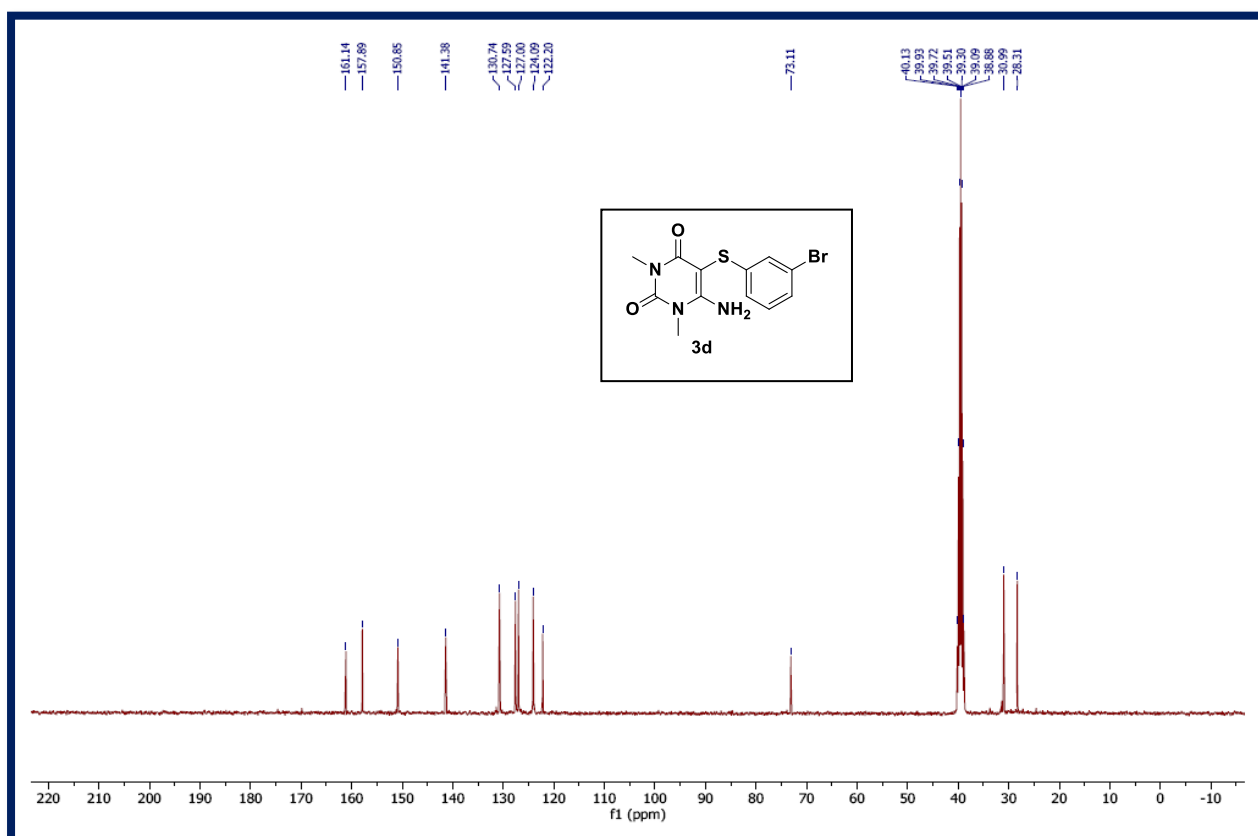

### <sup>1</sup>H NMR 3e

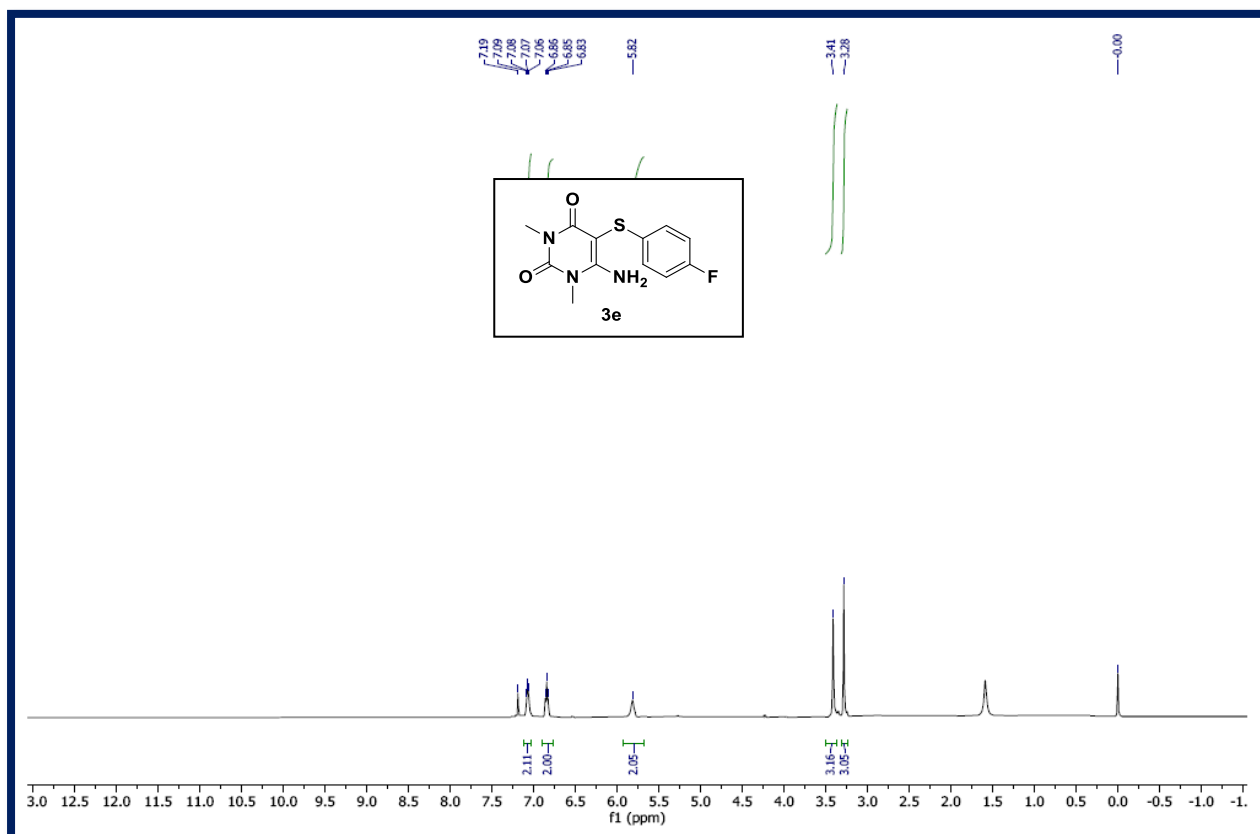

### <sup>13</sup>C NMR 3e

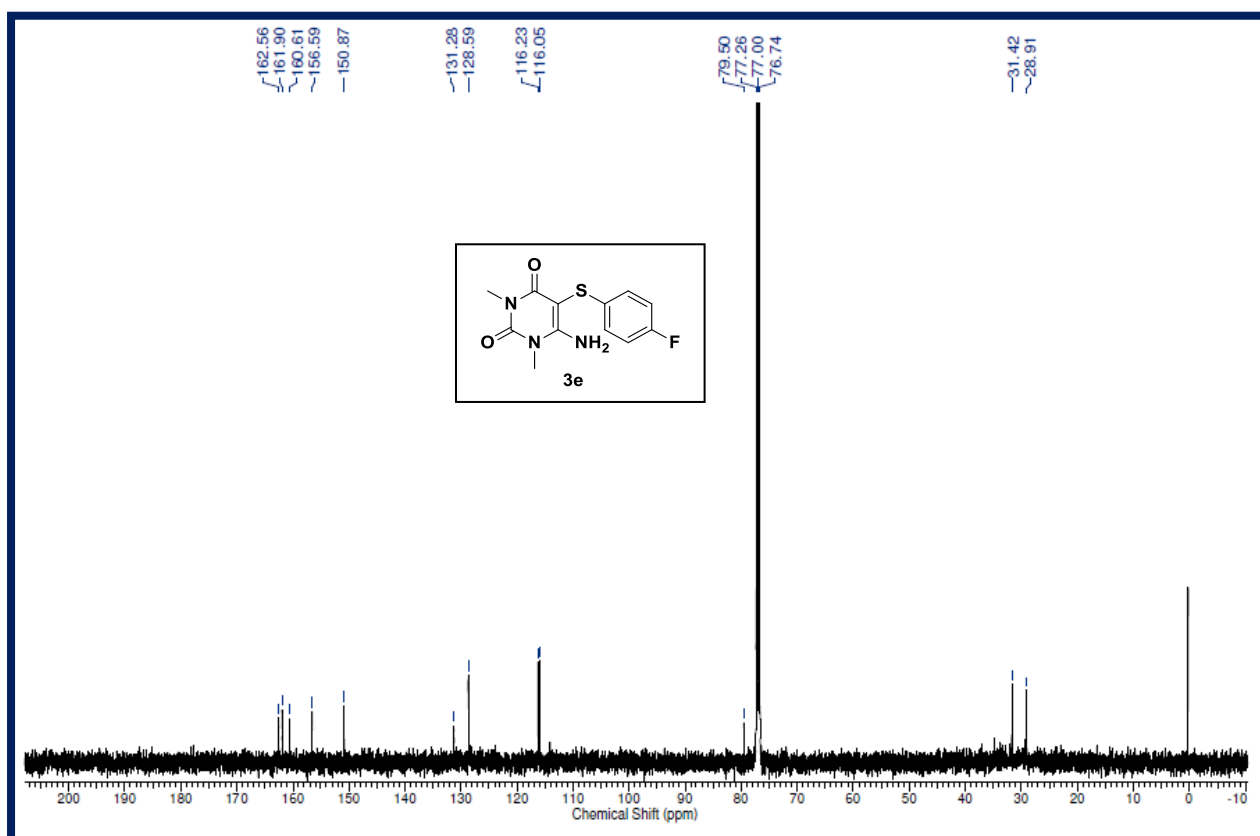

### <sup>1</sup>H NMR 3f

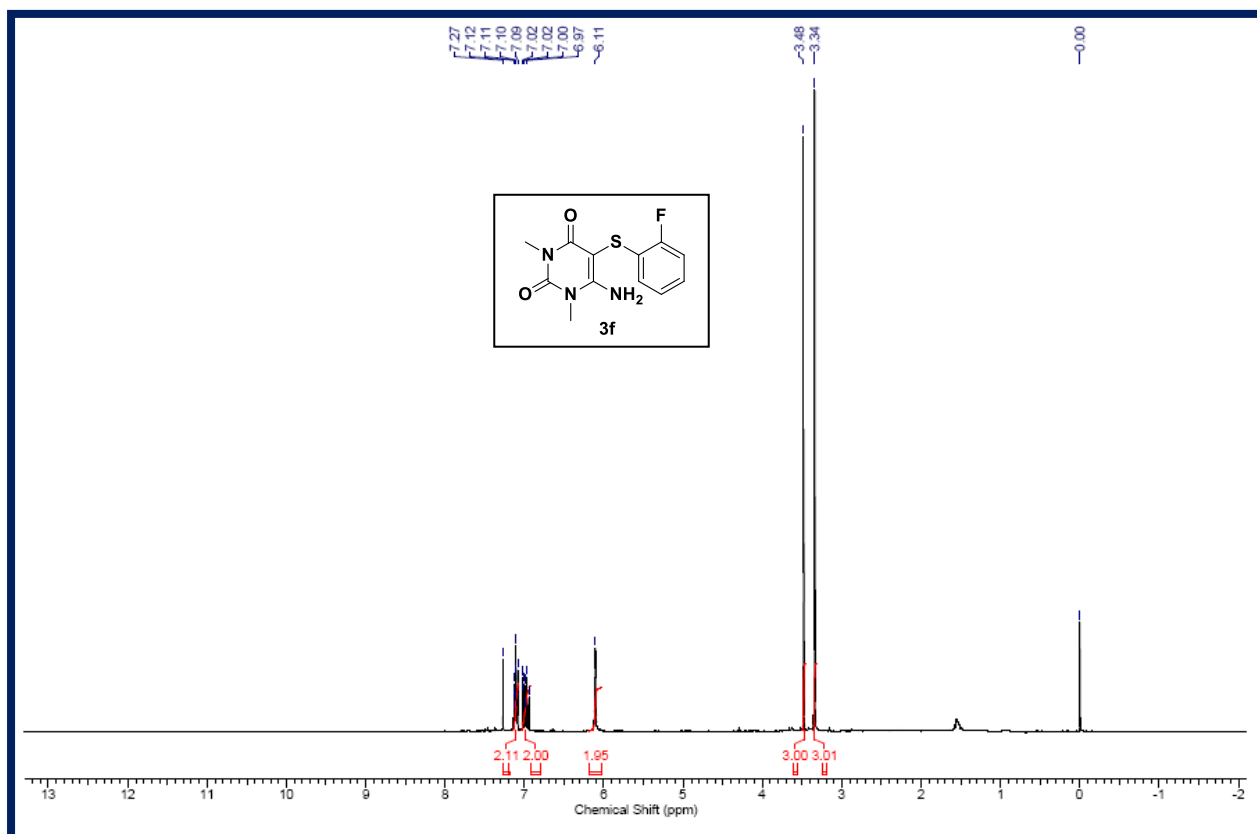

### <sup>13</sup>C NMR 3f

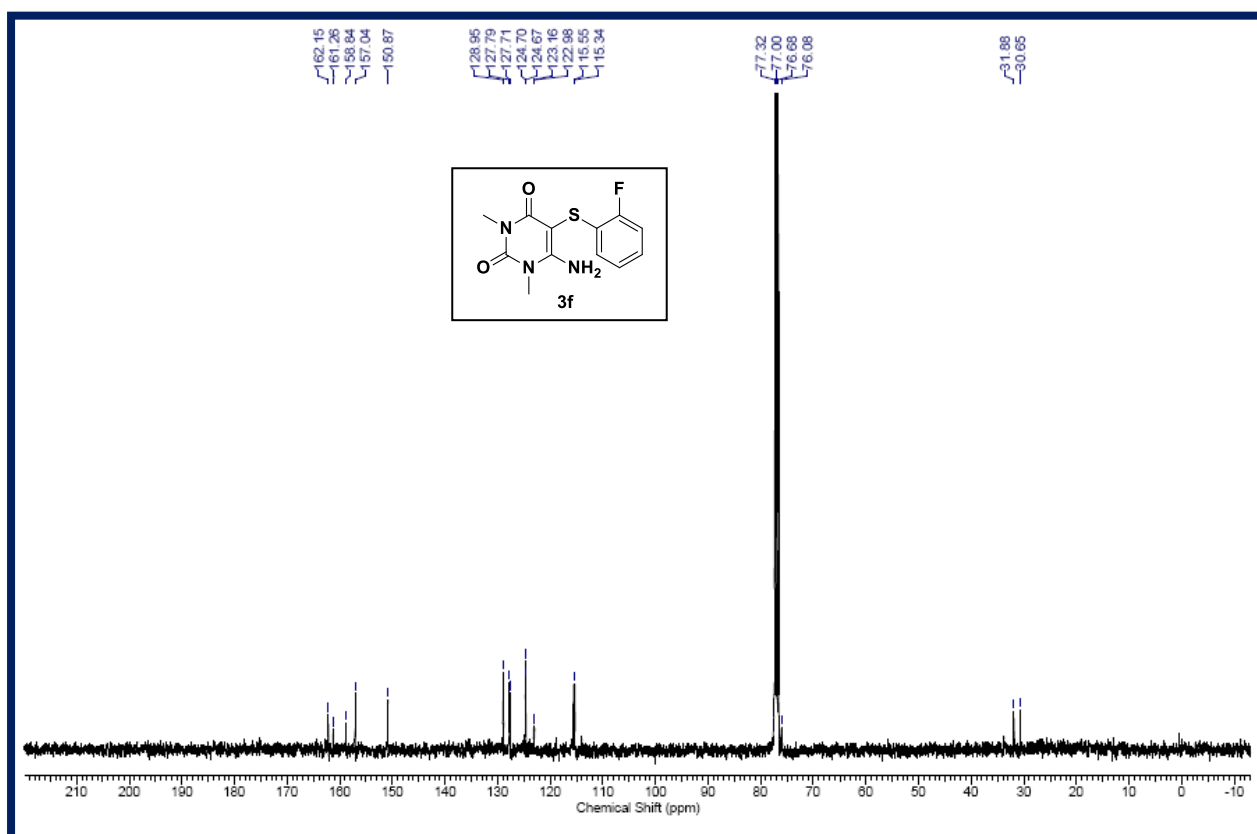



### <sup>1</sup>H NMR 3g

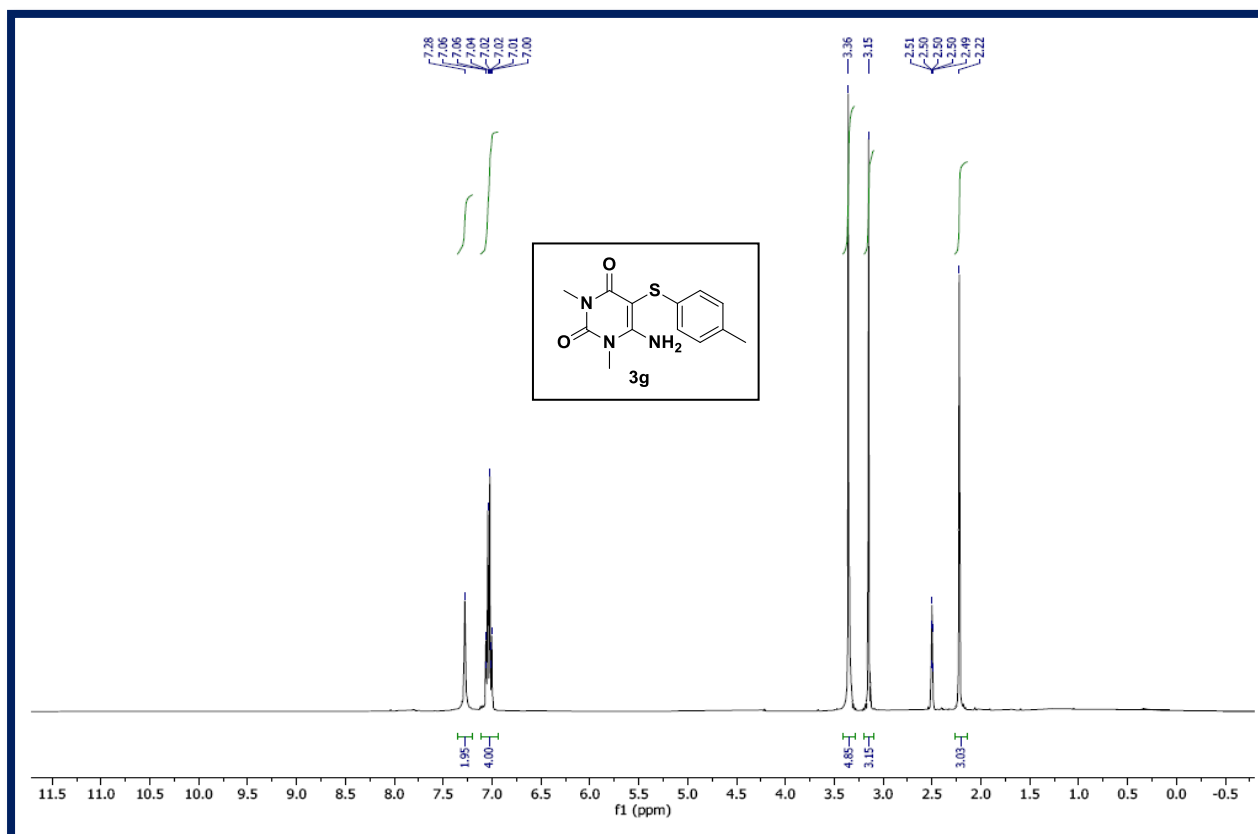

### <sup>13</sup>C NMR 3g

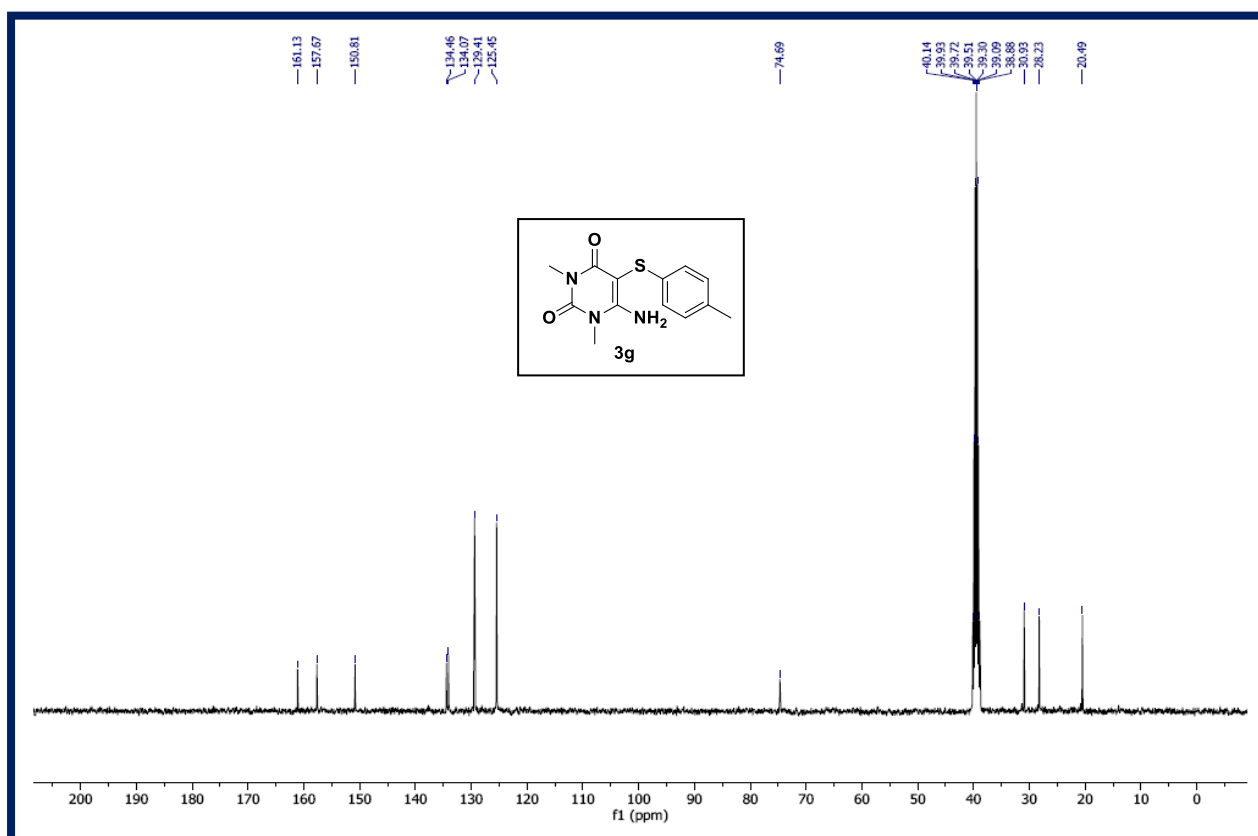

### <sup>1</sup>H NMR 3h

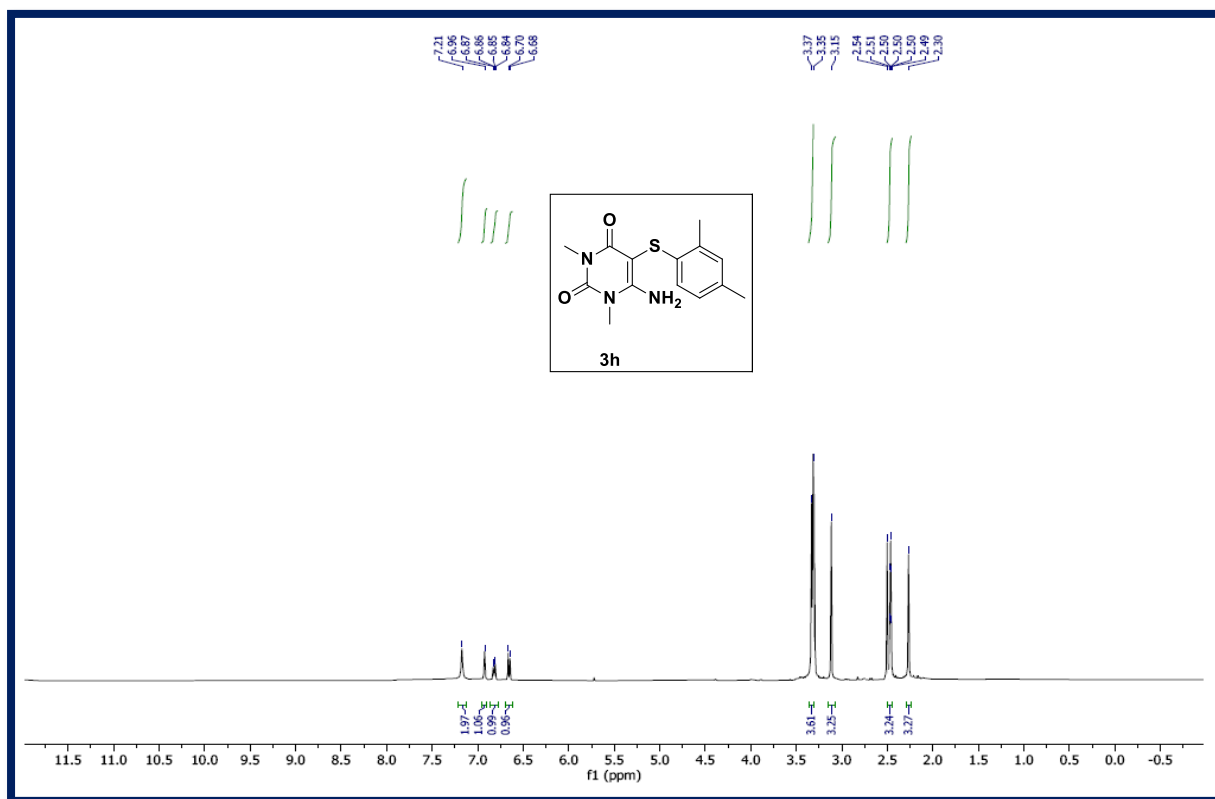

### <sup>13</sup>C NMR 3h

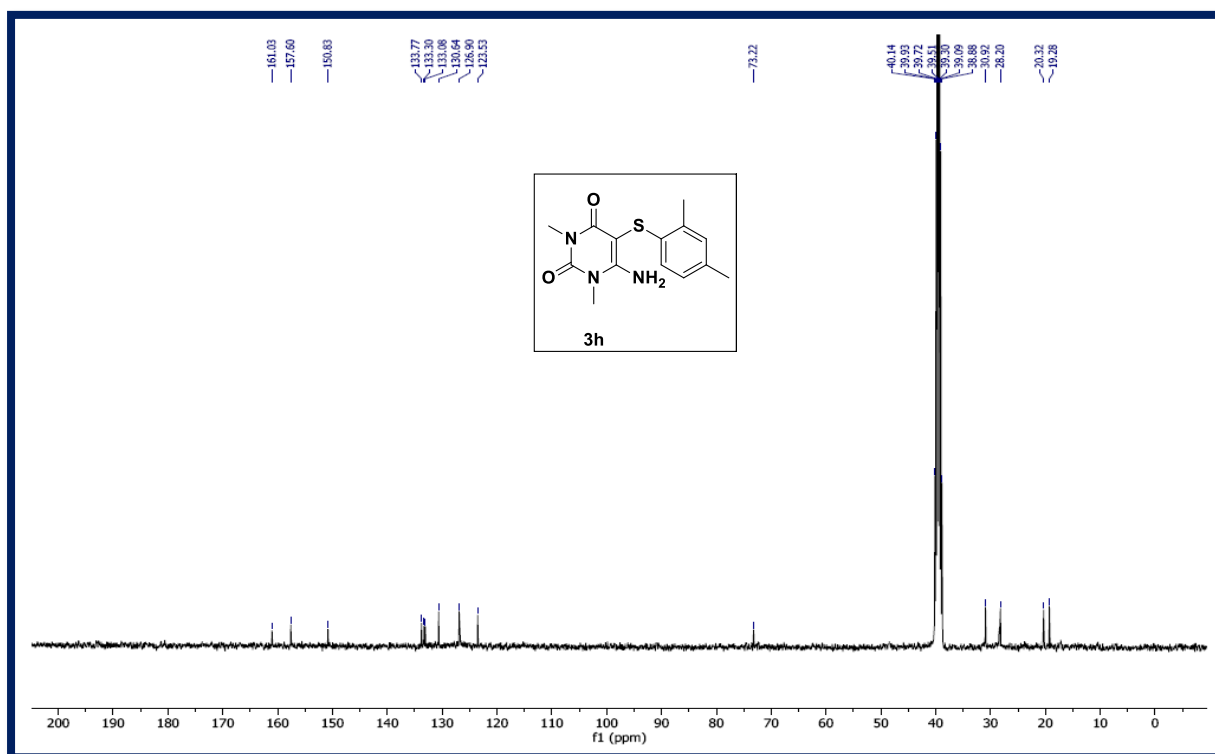

### <sup>1</sup>H NMR 3i

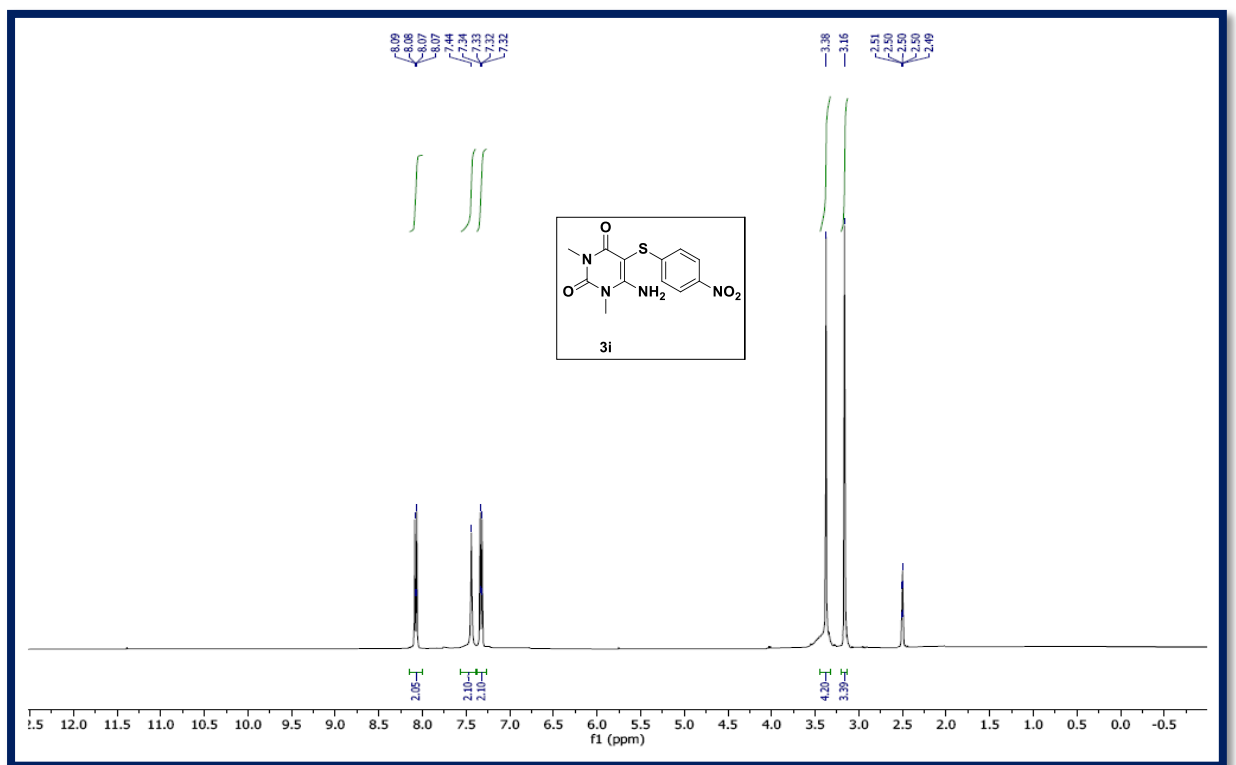

### <sup>13</sup>C NMR 3i

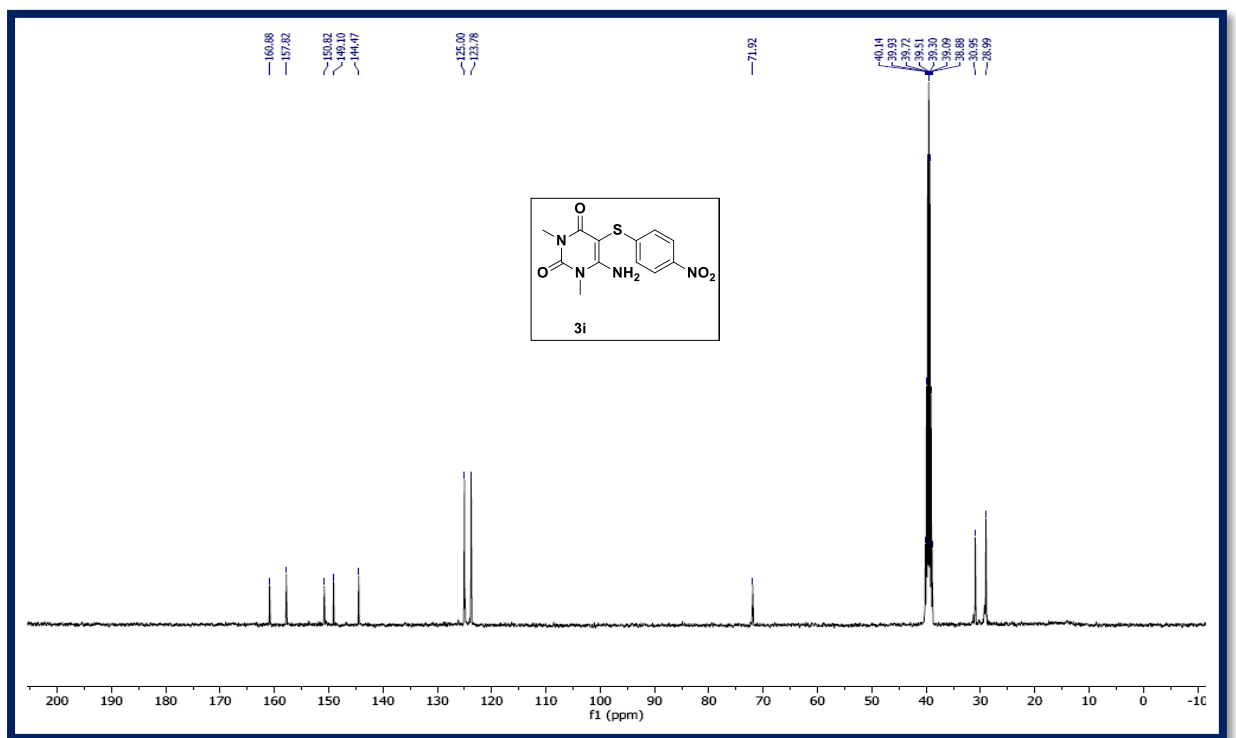

### <sup>1</sup>H NMR 3j

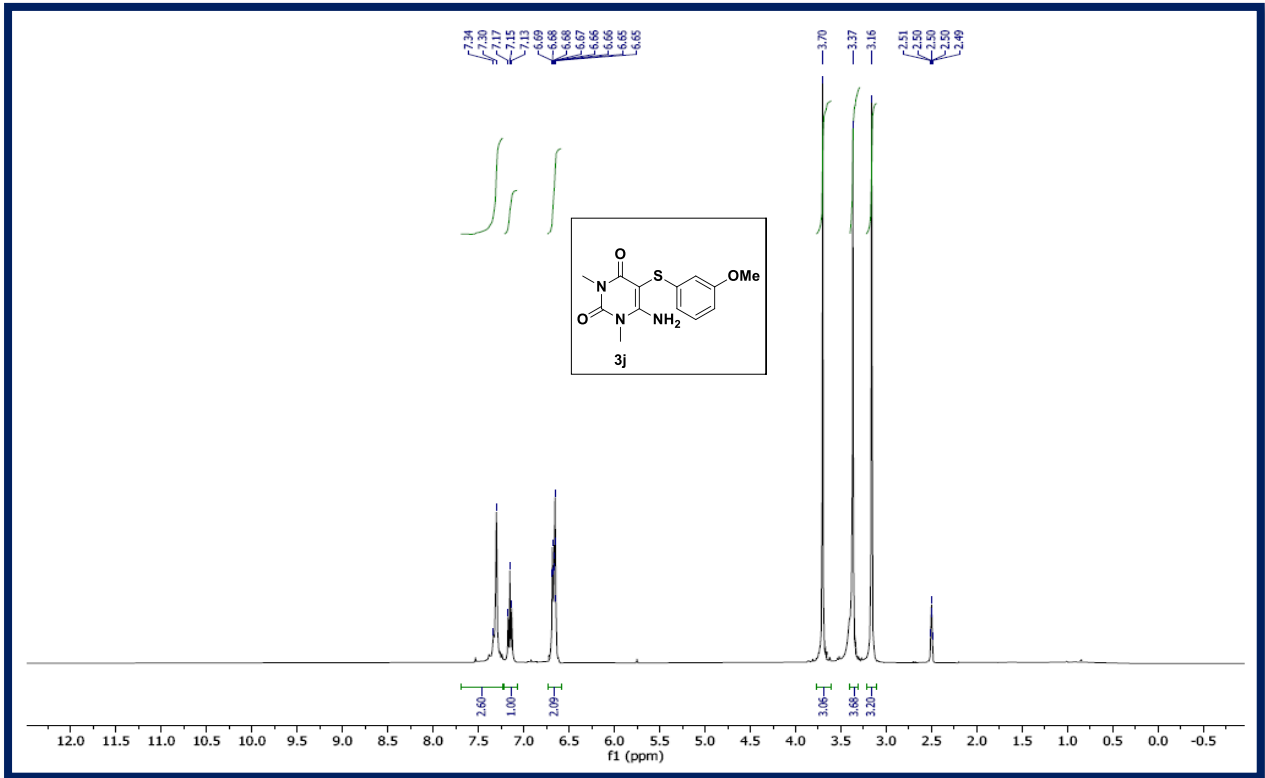

### <sup>13</sup>C NMR 3j

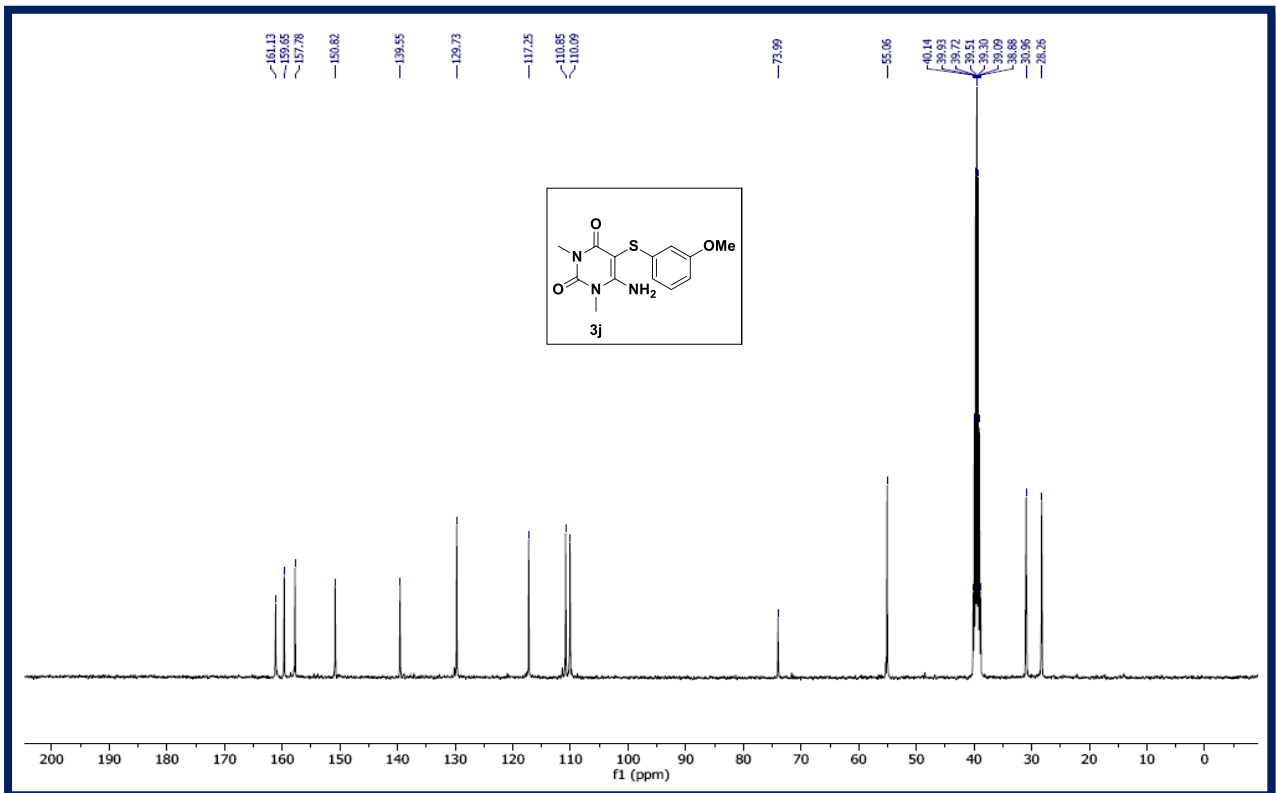

### <sup>1</sup>H NMR 3k

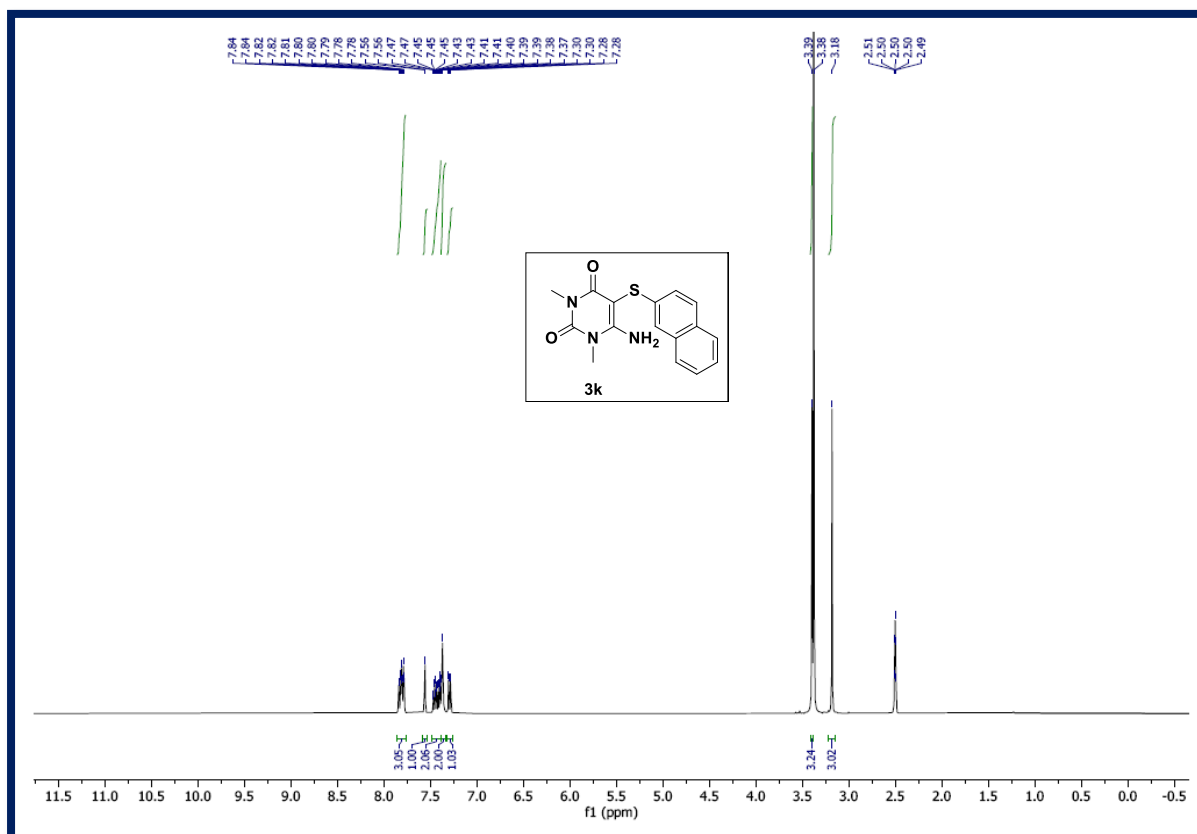

### <sup>13</sup>C NMR 3k

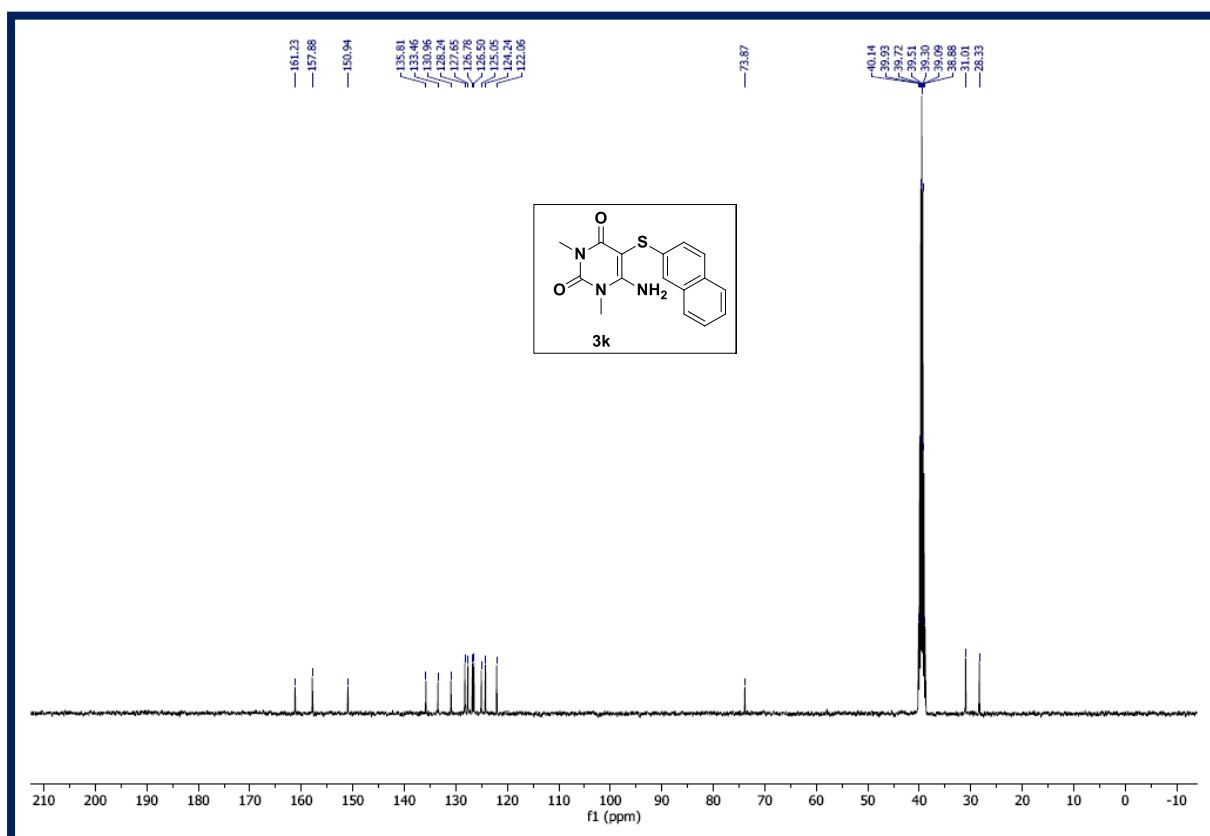

### <sup>1</sup>H NMR 3I

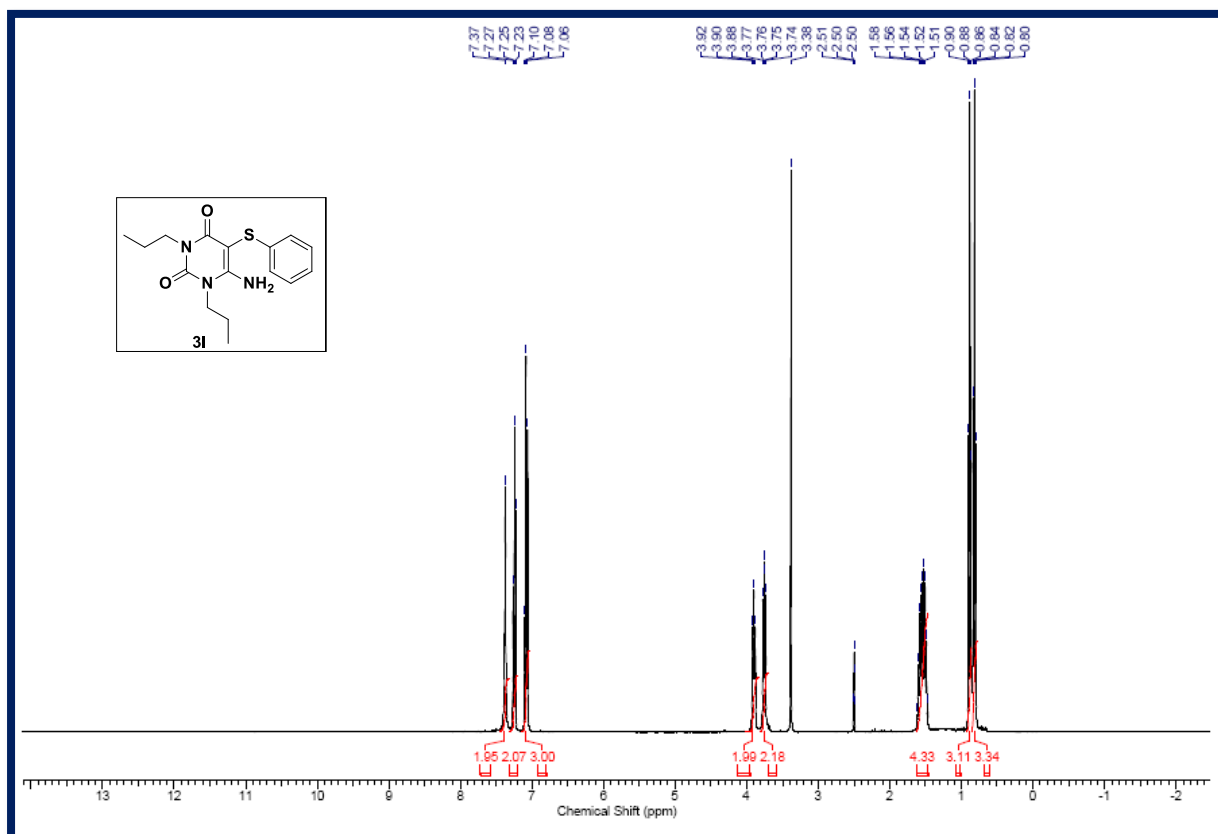

### <sup>13</sup>C NMR 3I

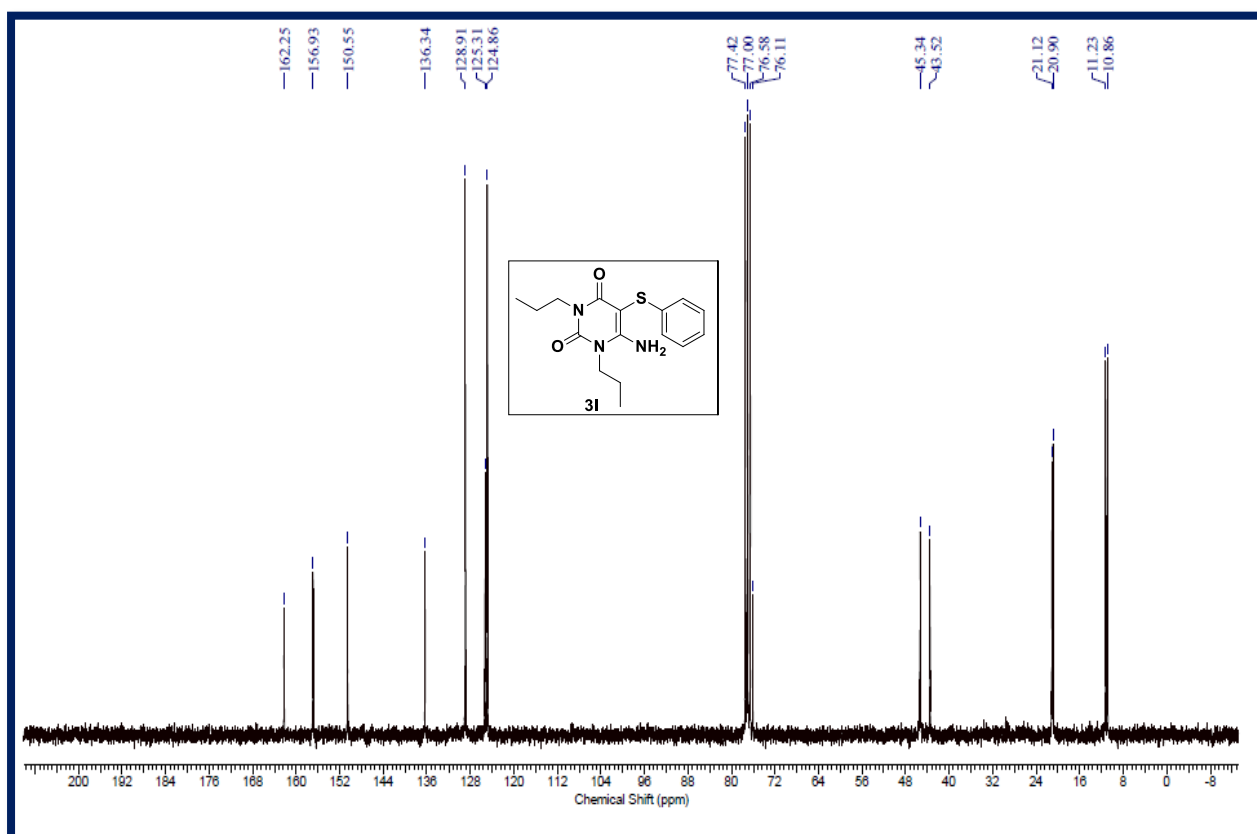

### <sup>1</sup>H NMR 3m

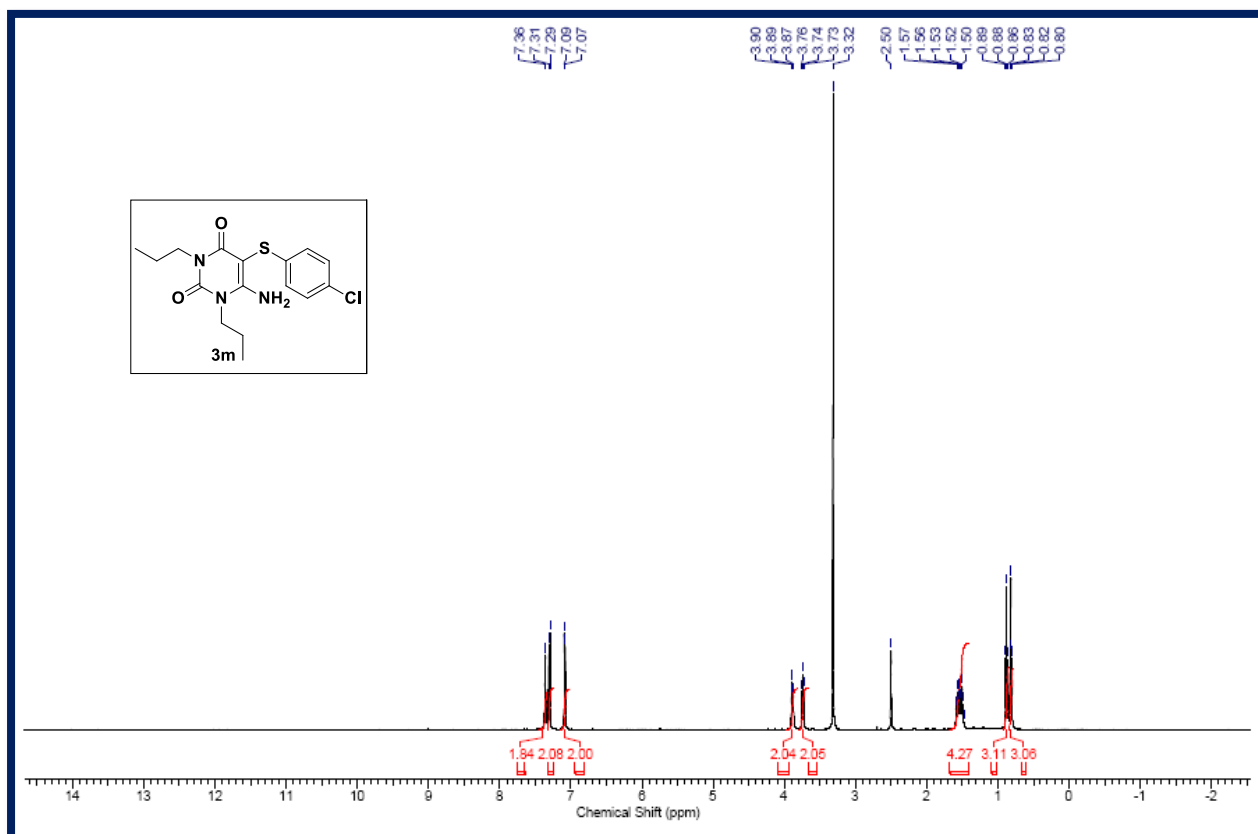

### <sup>13</sup>C NMR 3m

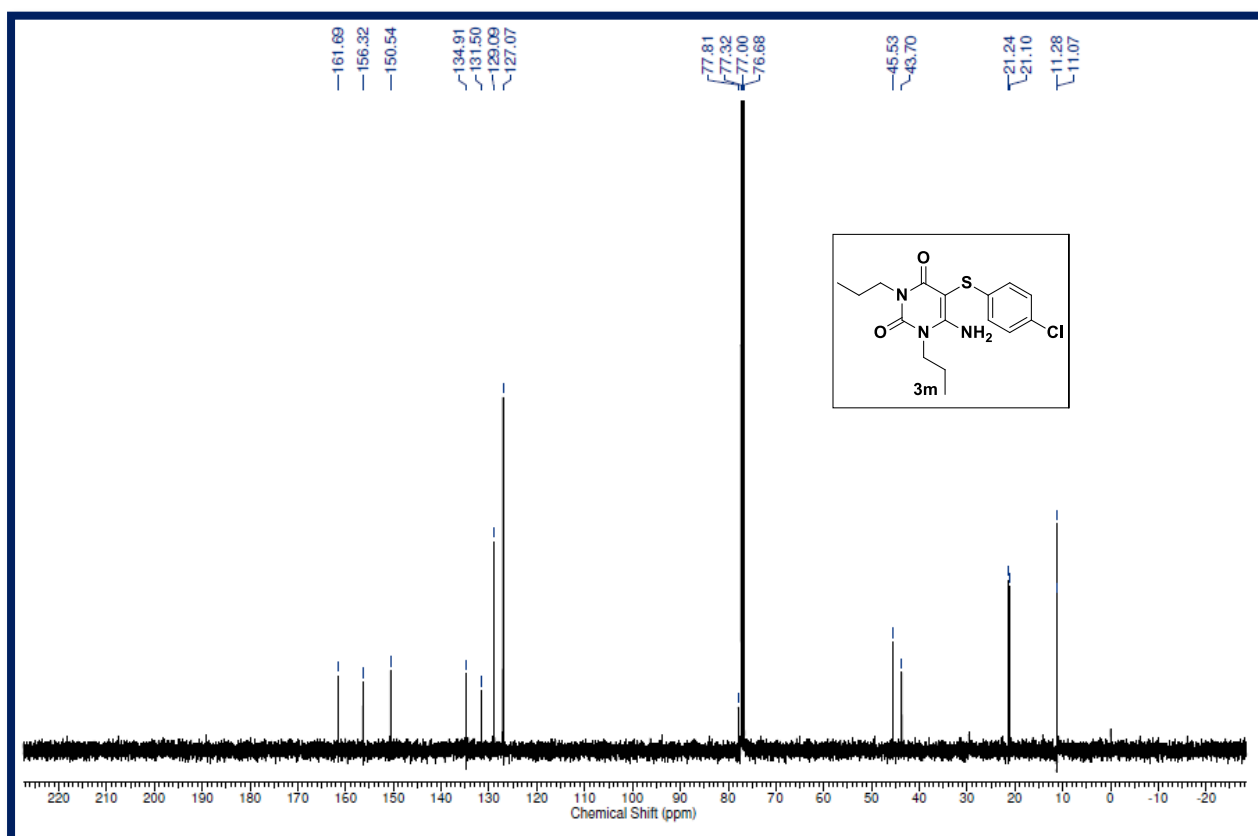

### <sup>1</sup>H NMR 3n

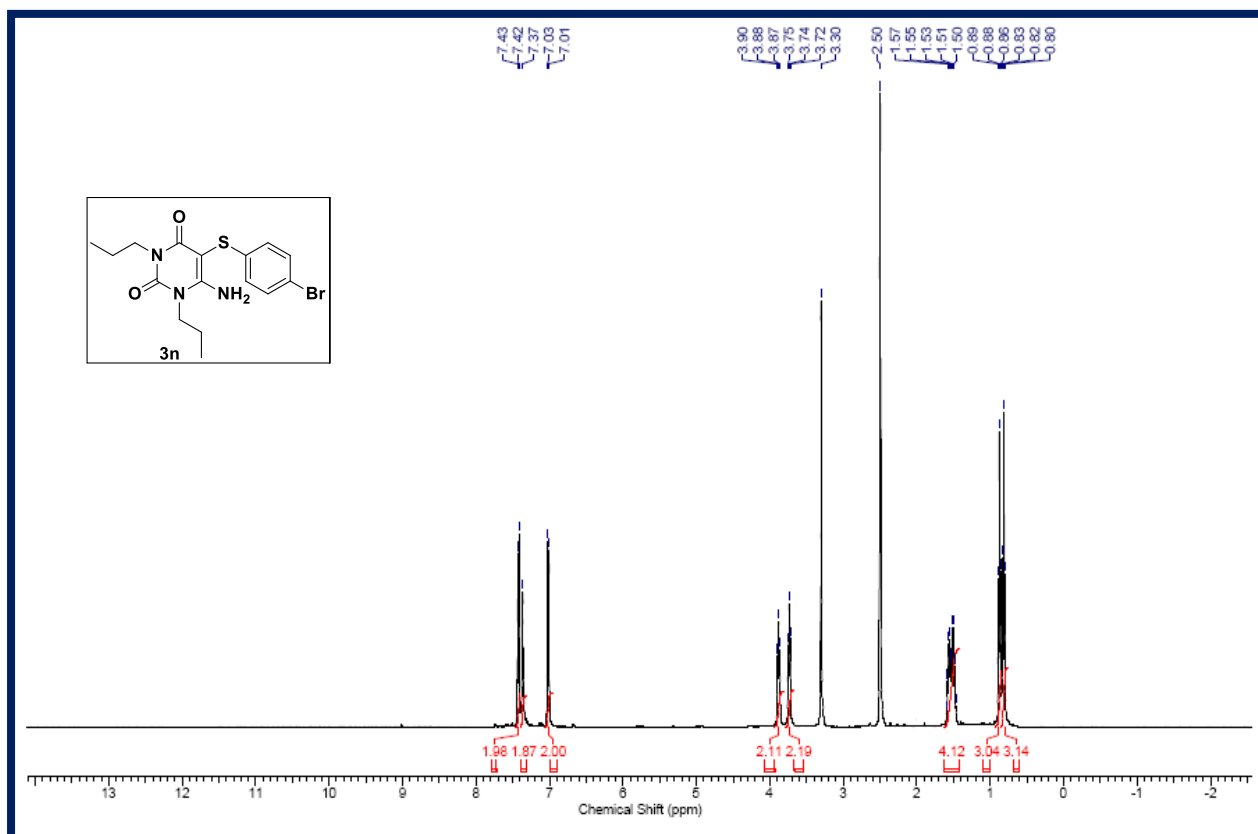

### <sup>13</sup>C NMR 3n

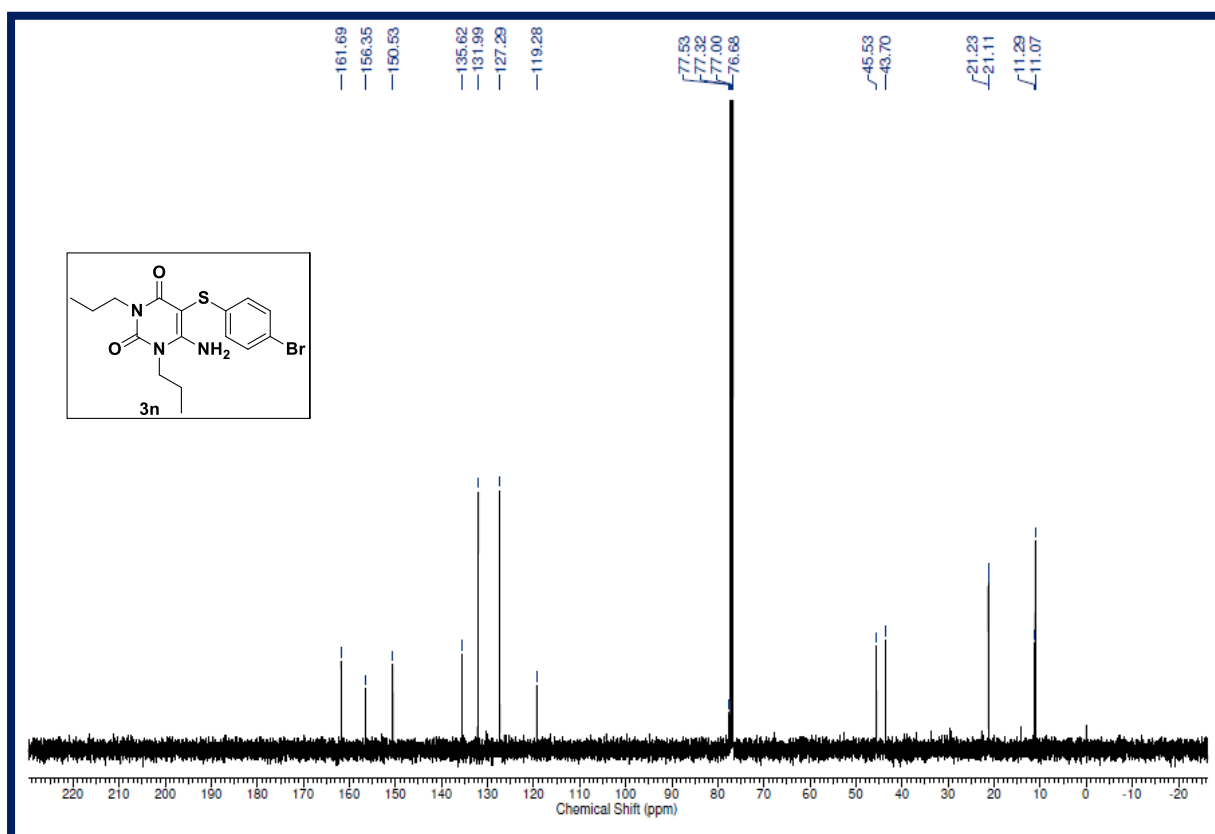



### <sup>1</sup>H NMR 3o

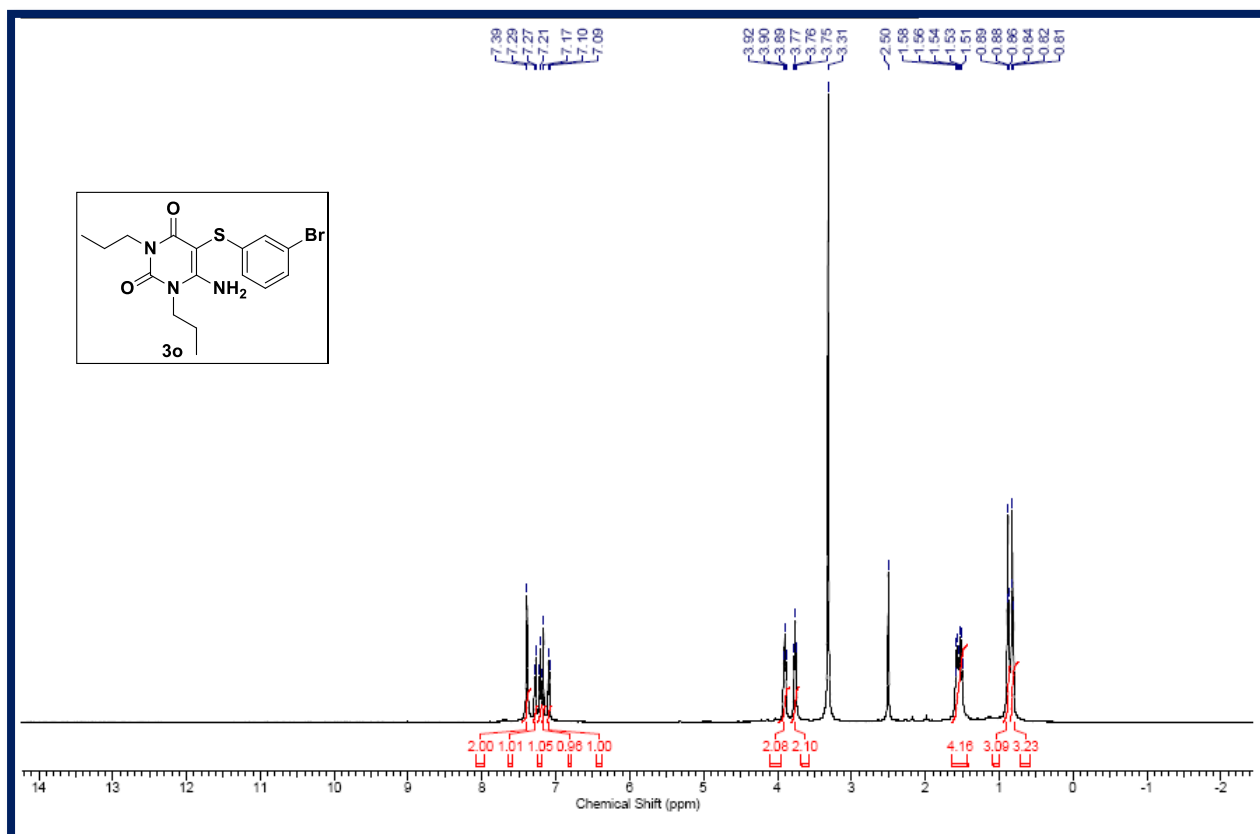

### <sup>13</sup>C NMR 3o

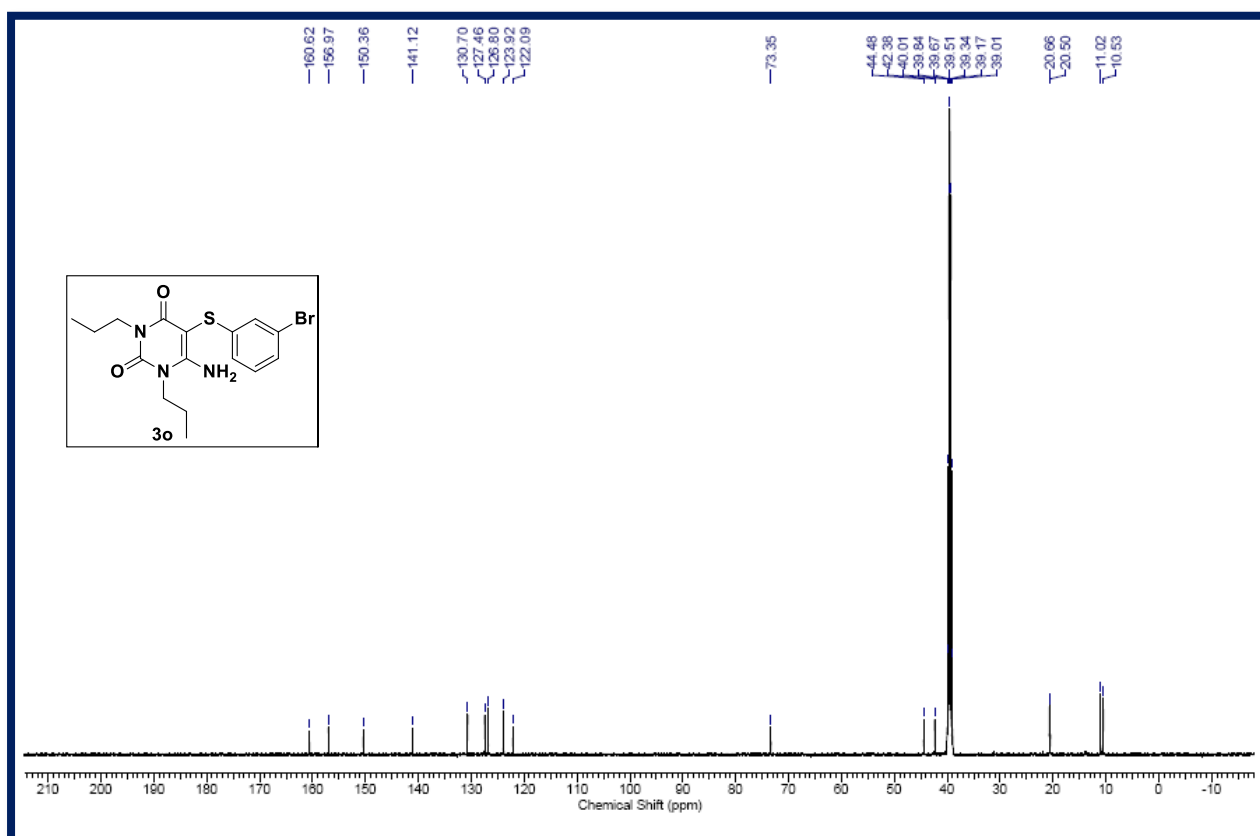

### <sup>1</sup>H NMR 3p

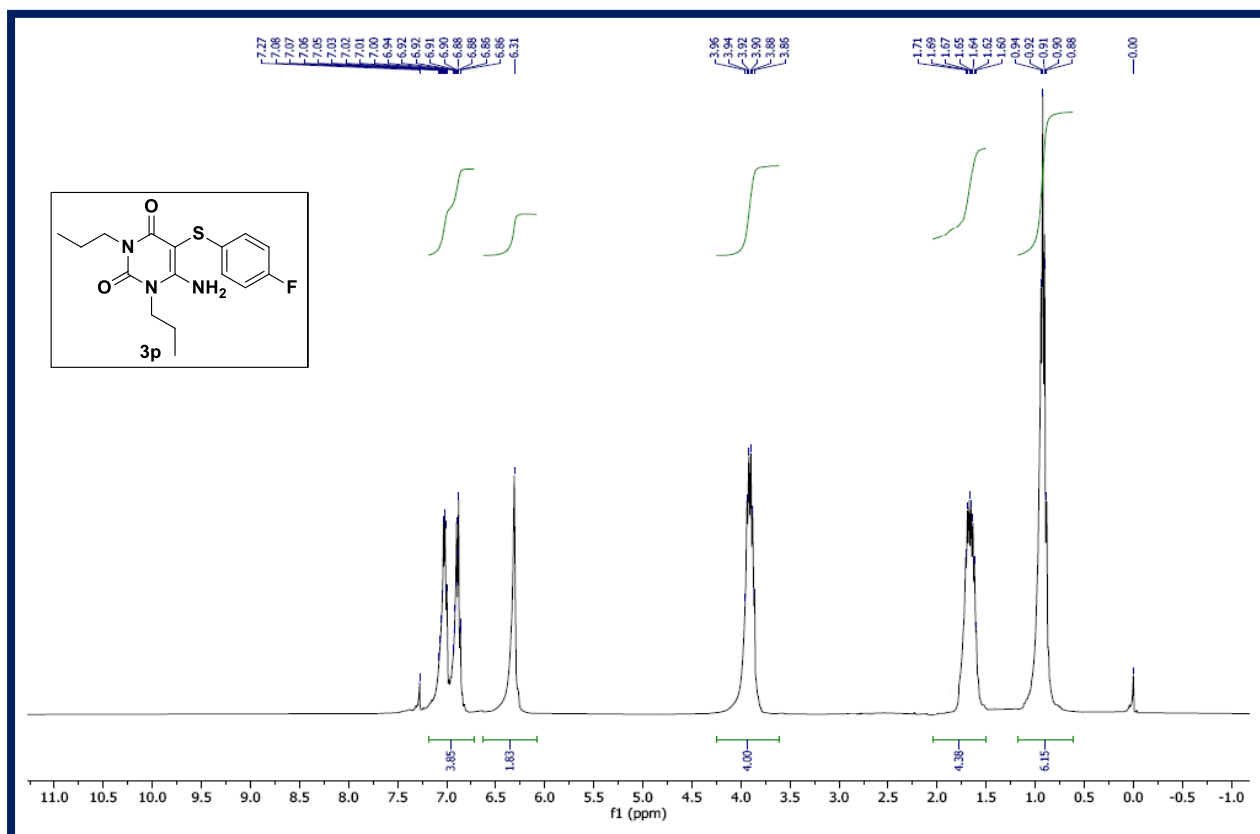

### <sup>13</sup>C NMR 3p

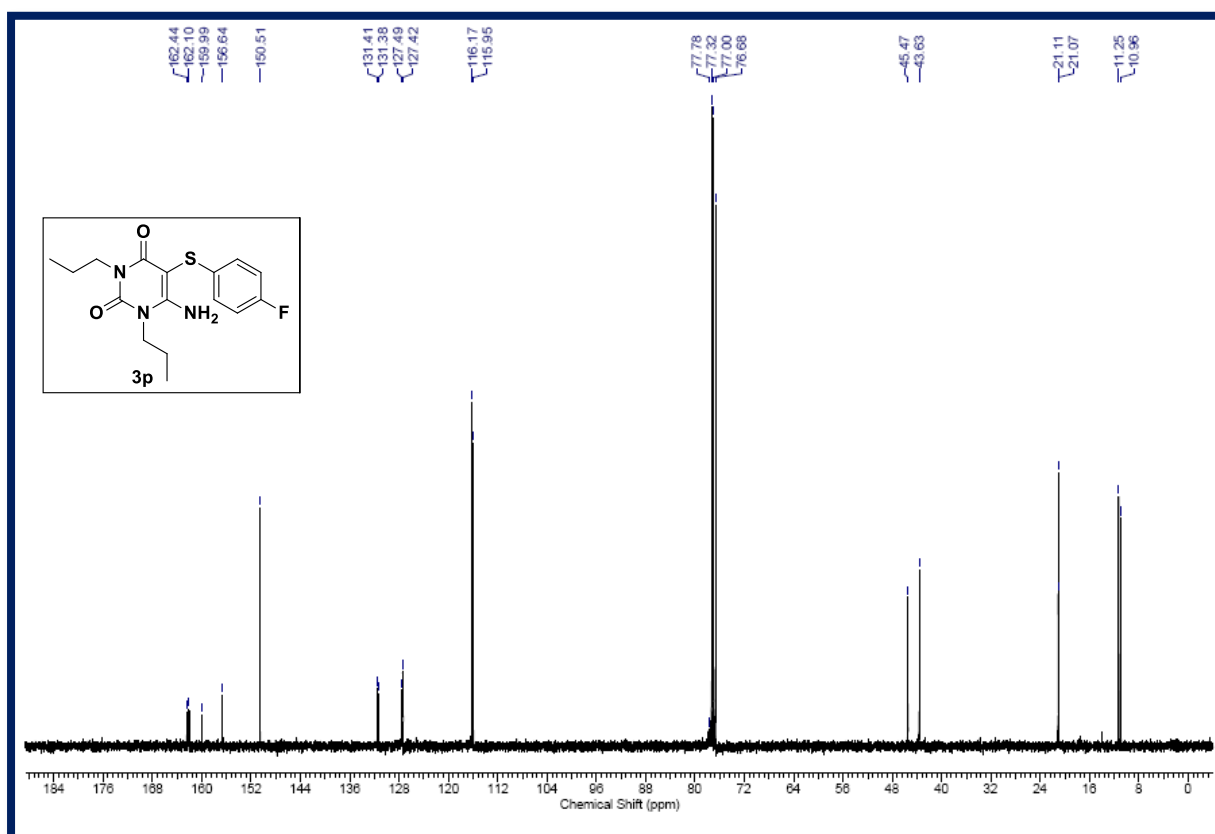

### <sup>1</sup>H NMR 3q

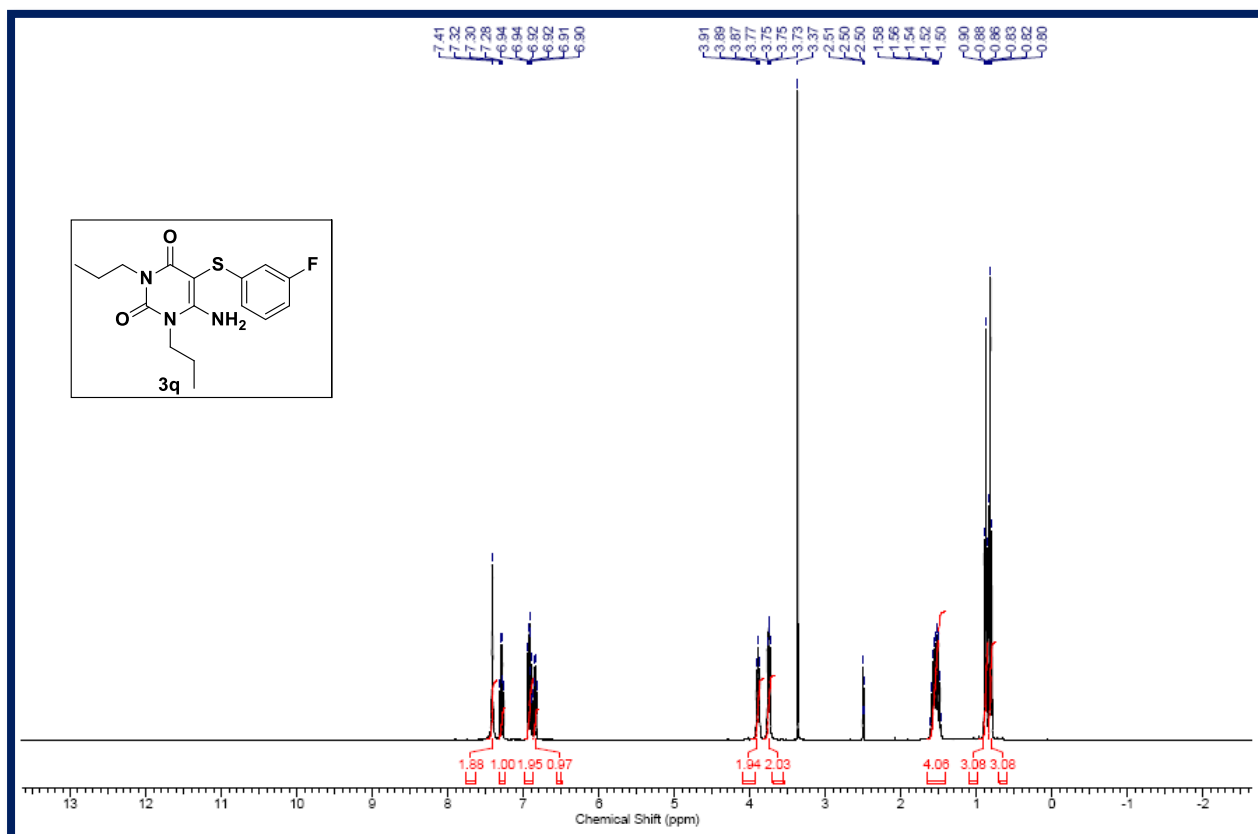

### <sup>13</sup>C NMR 3q

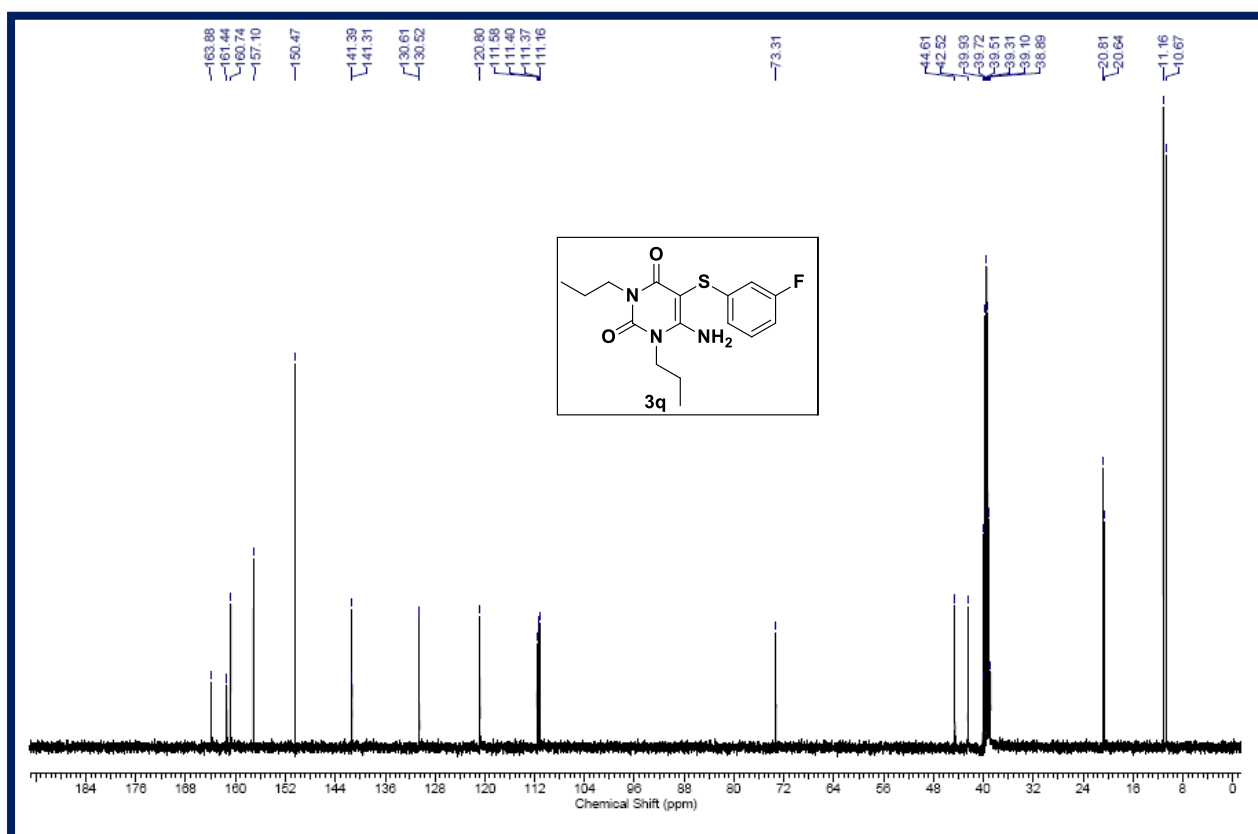

### <sup>1</sup>H NMR 3r

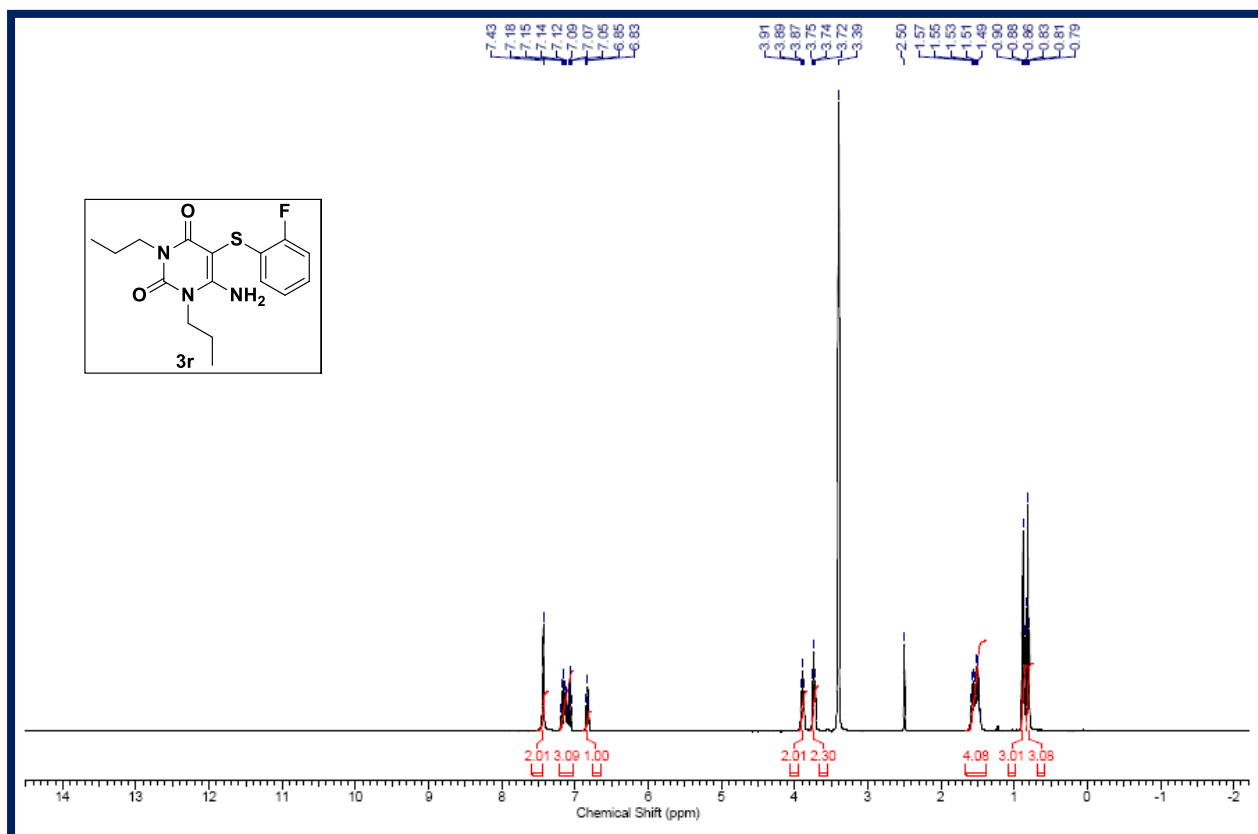

### <sup>13</sup>C NMR 3r

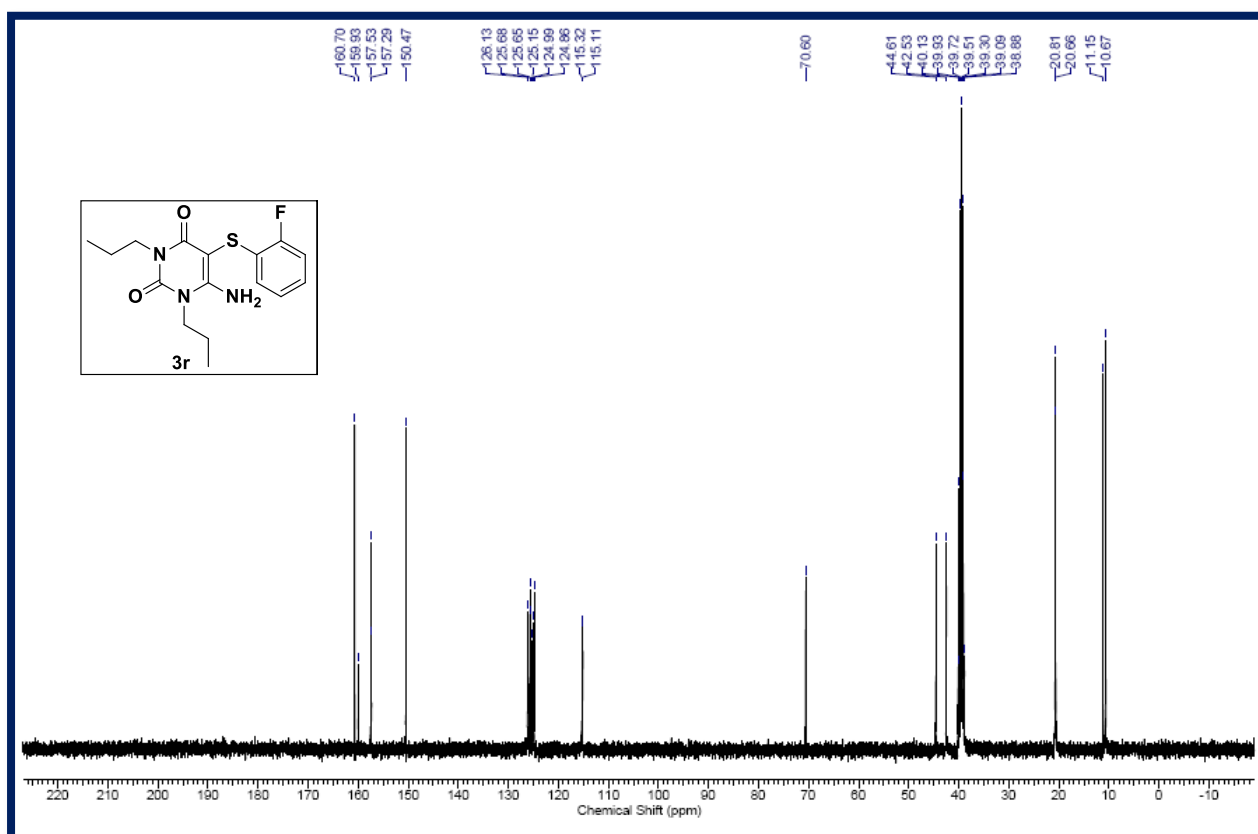

### <sup>1</sup>H NMR 3s

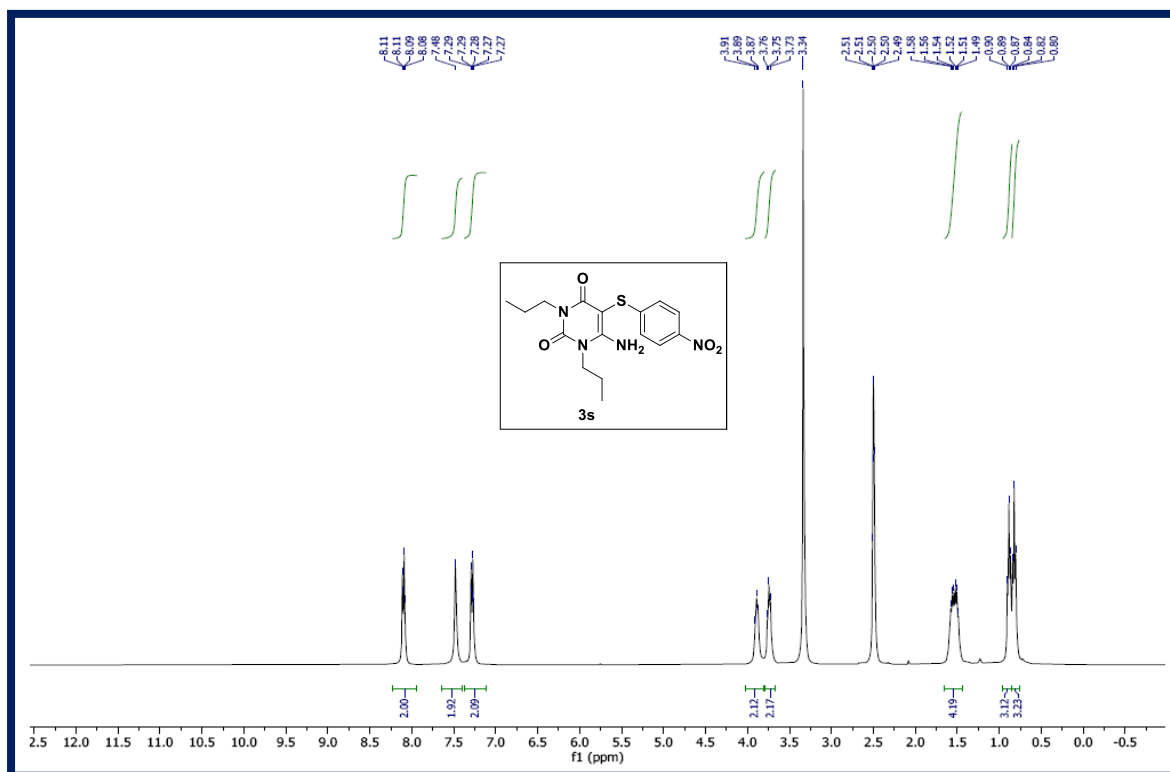

### <sup>13</sup>C NMR 3s

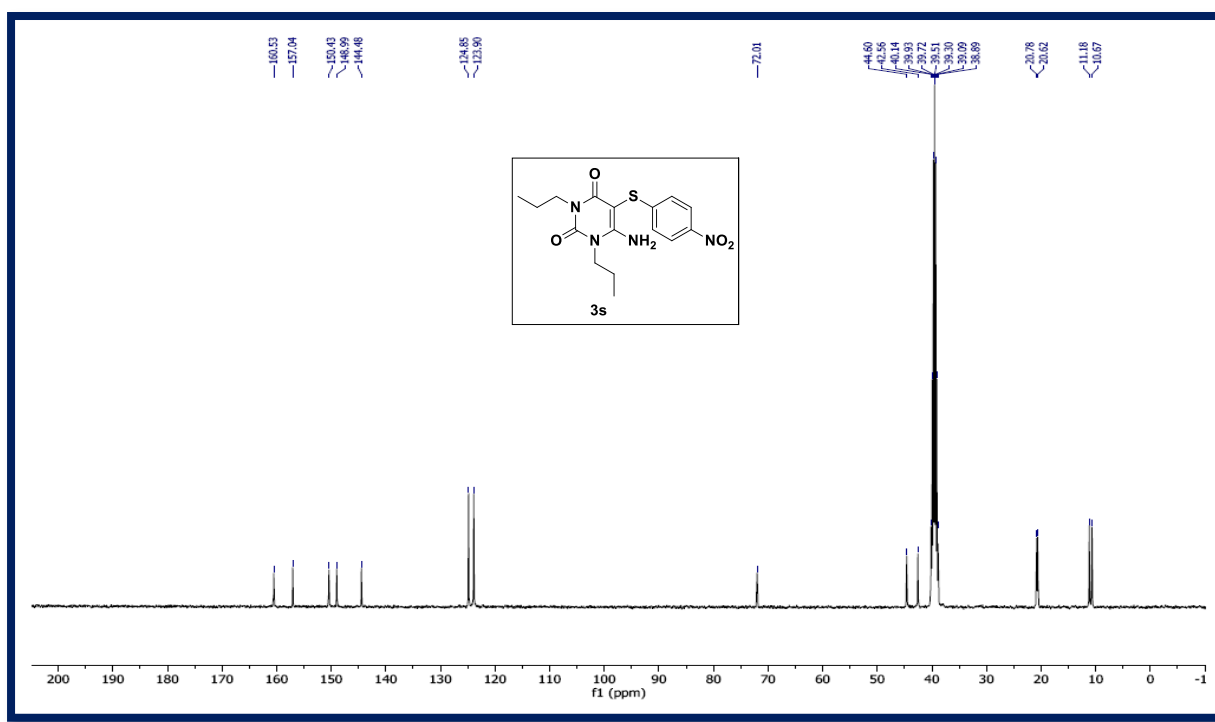

### <sup>1</sup>H NMR 3t

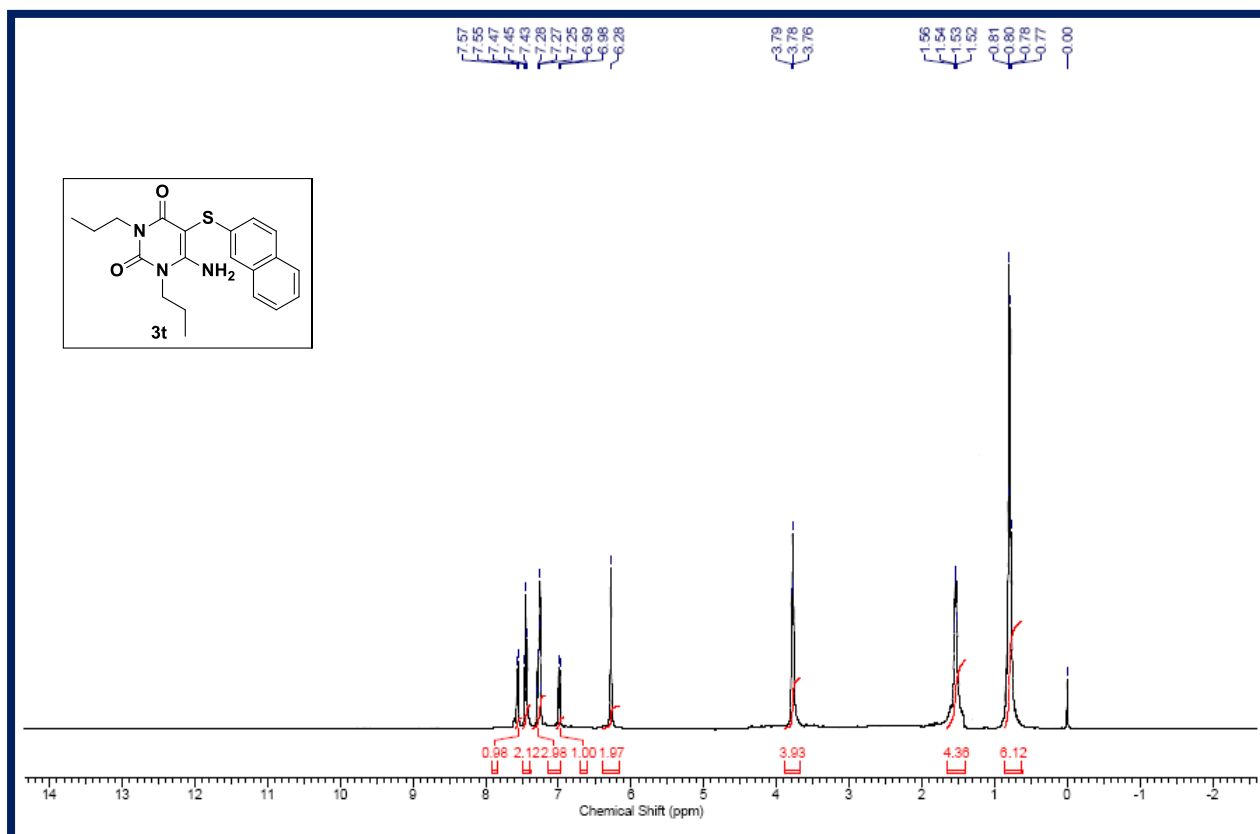

### <sup>13</sup>C NMR 3t

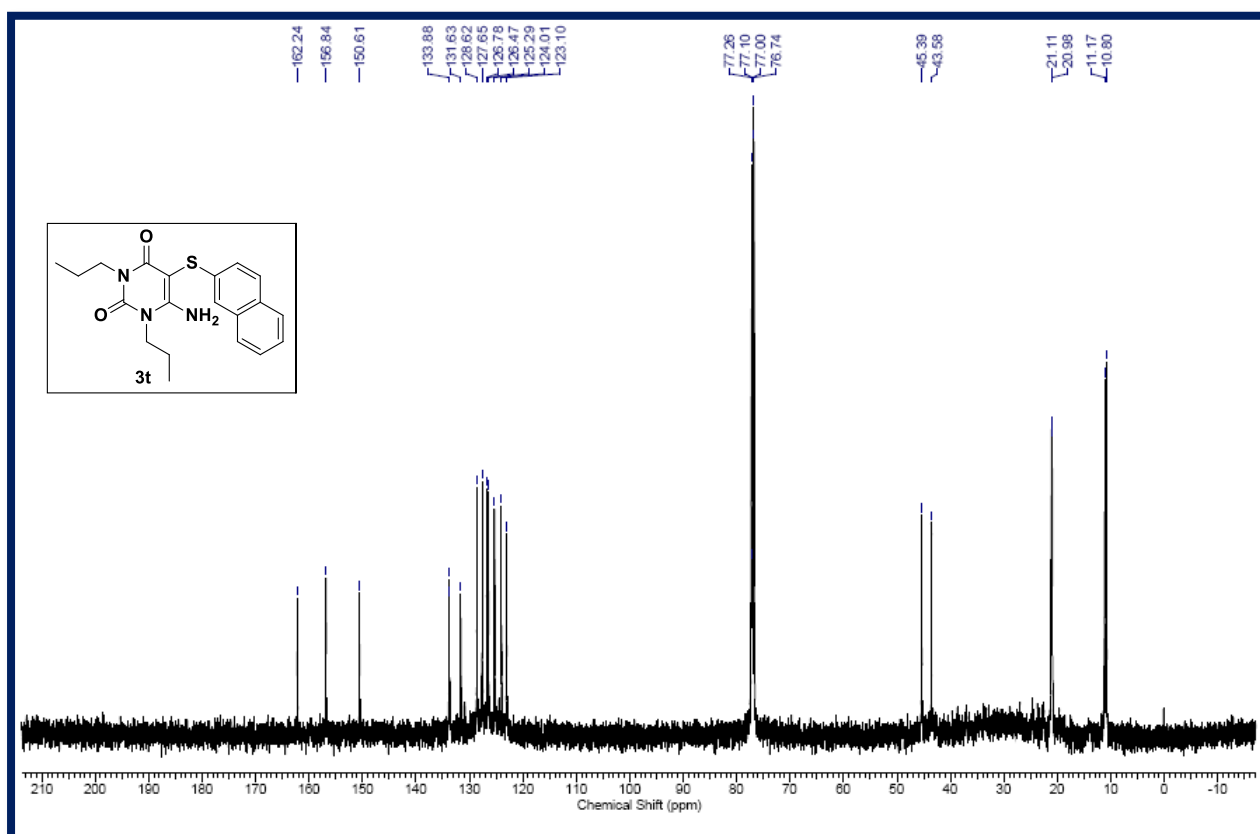

### <sup>1</sup>H NMR 3u

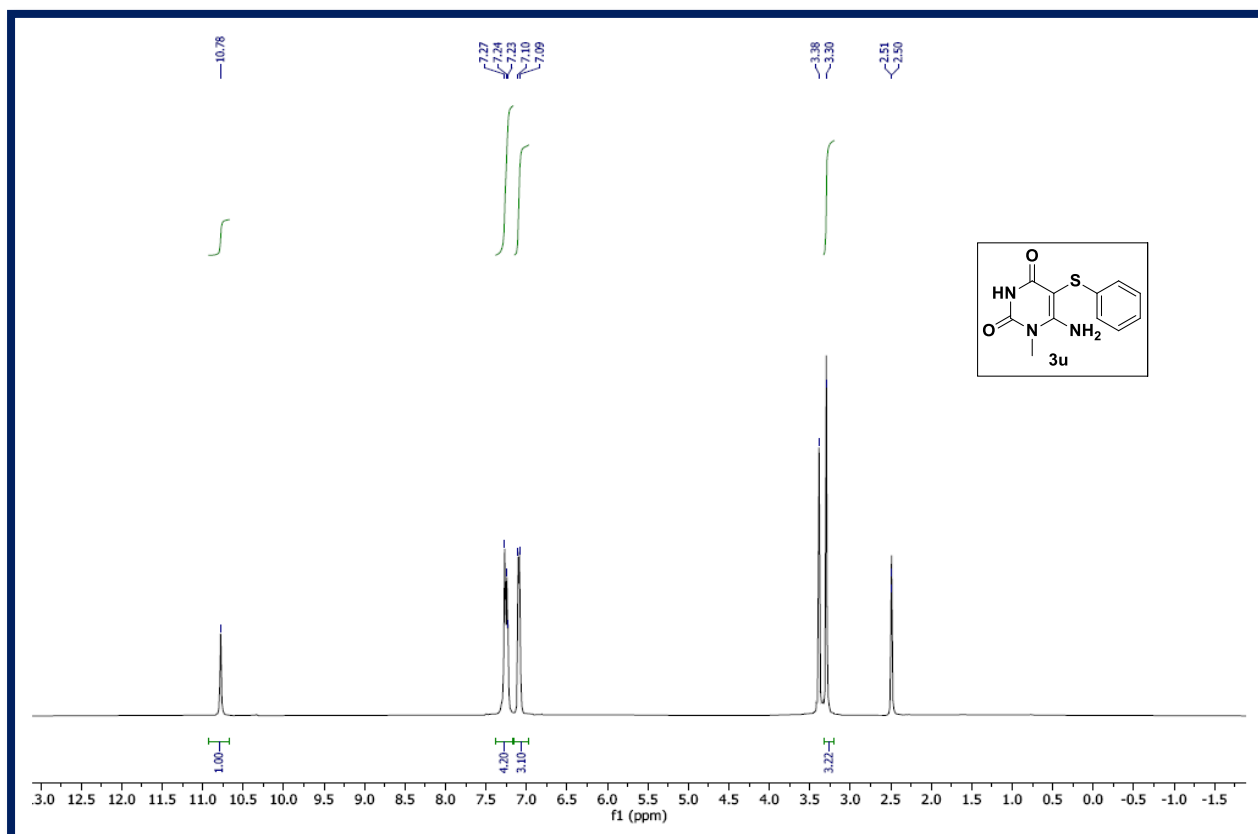

### <sup>13</sup>C NMR 3u

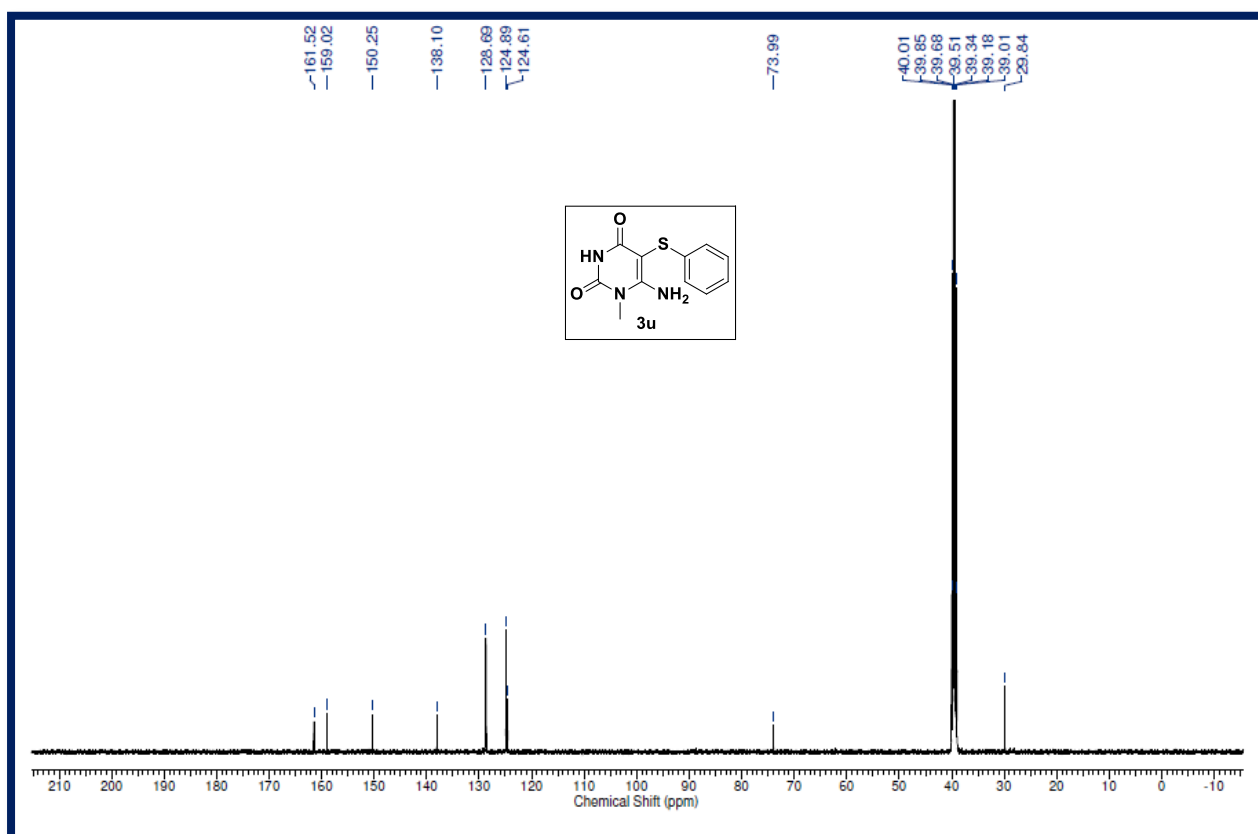





### <sup>1</sup>H NMR 3w

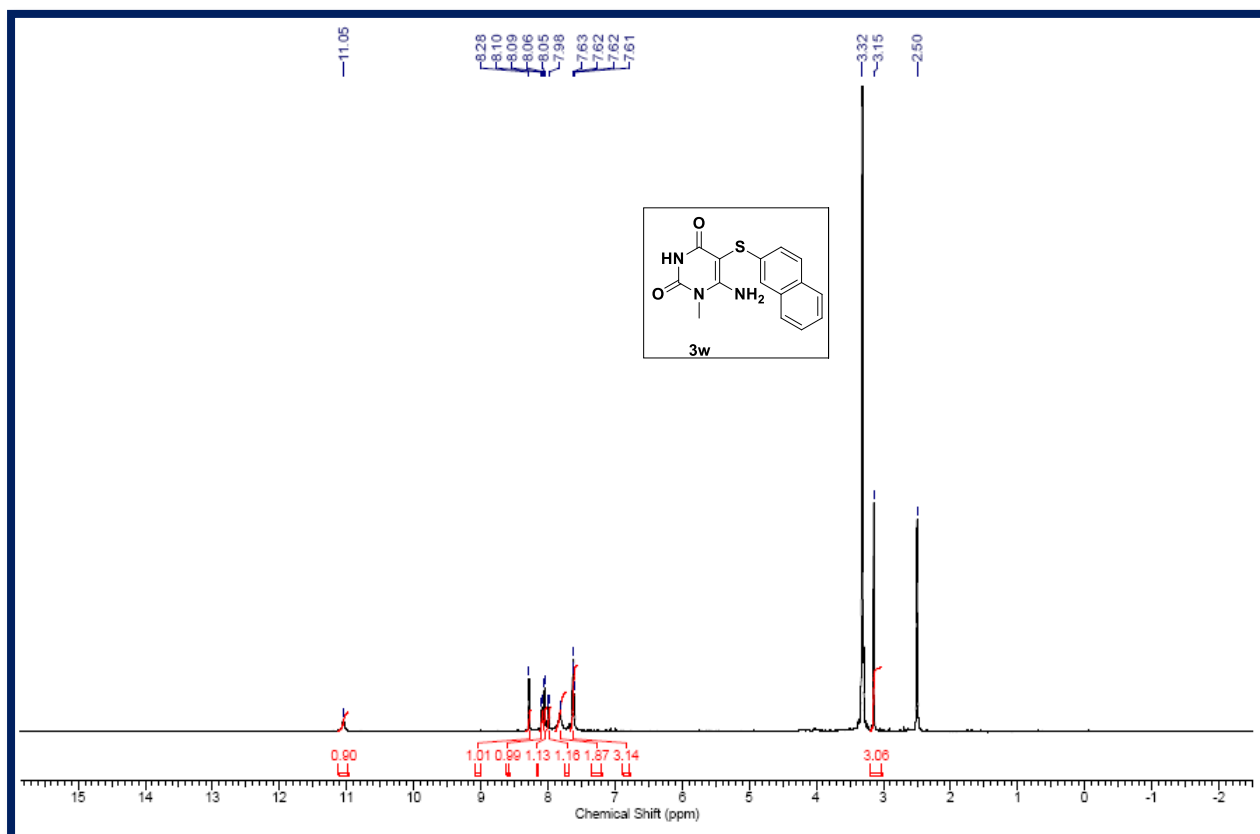

### <sup>13</sup>C NMR 3w

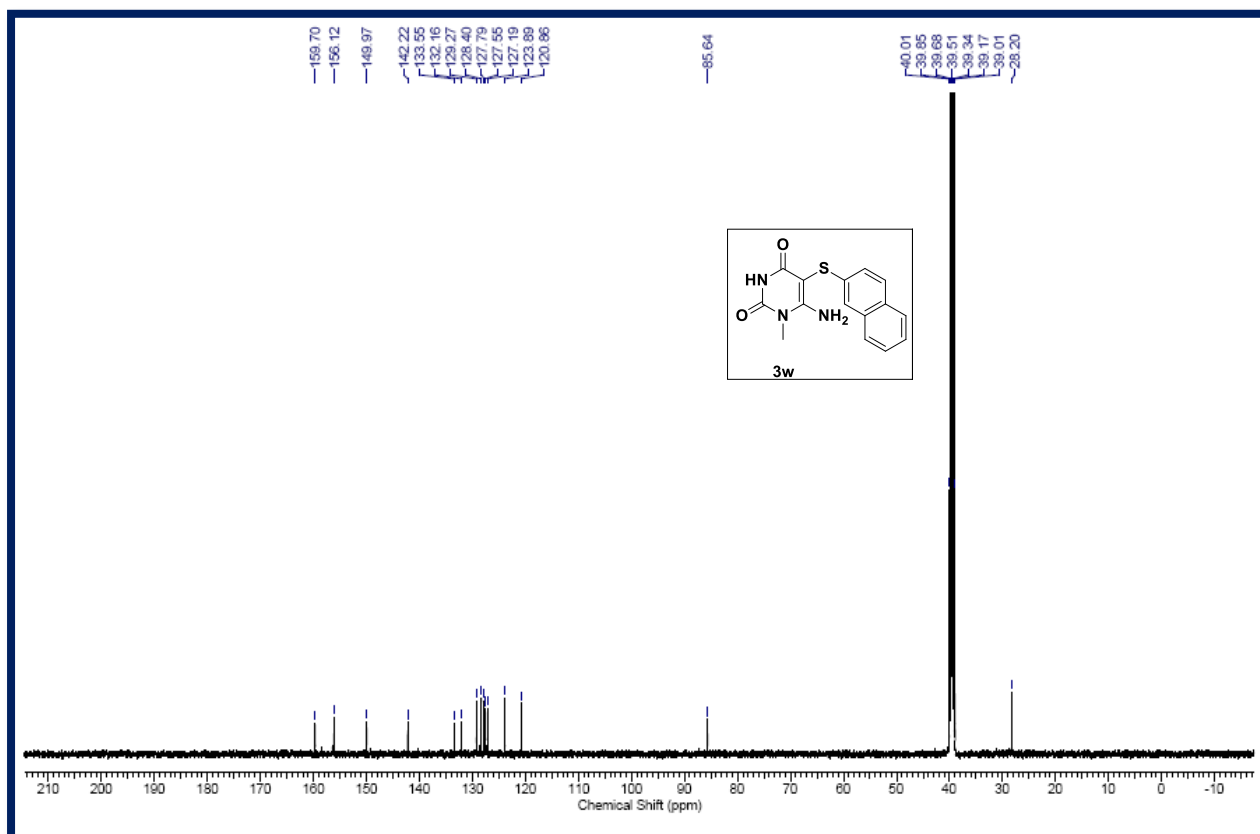

### <sup>1</sup>H NMR 3x

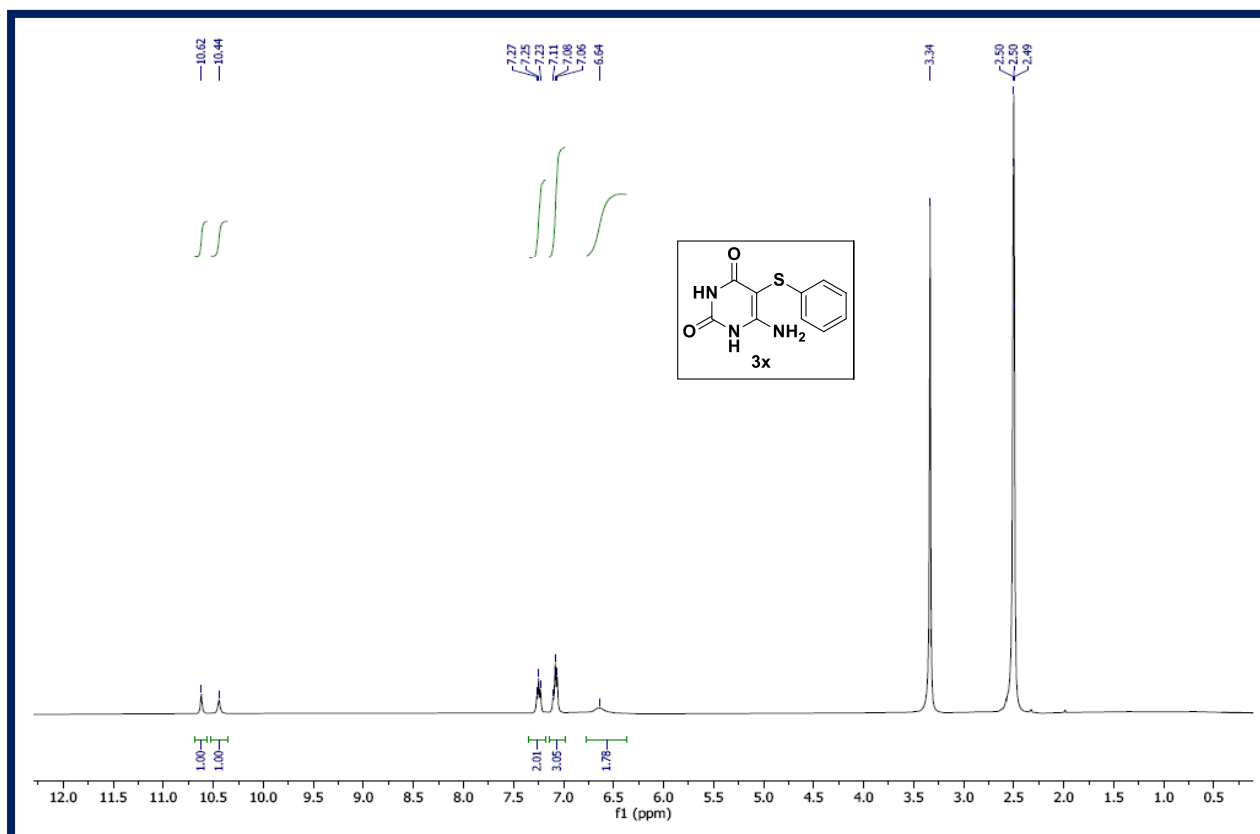

### <sup>13</sup>C NMR 3x

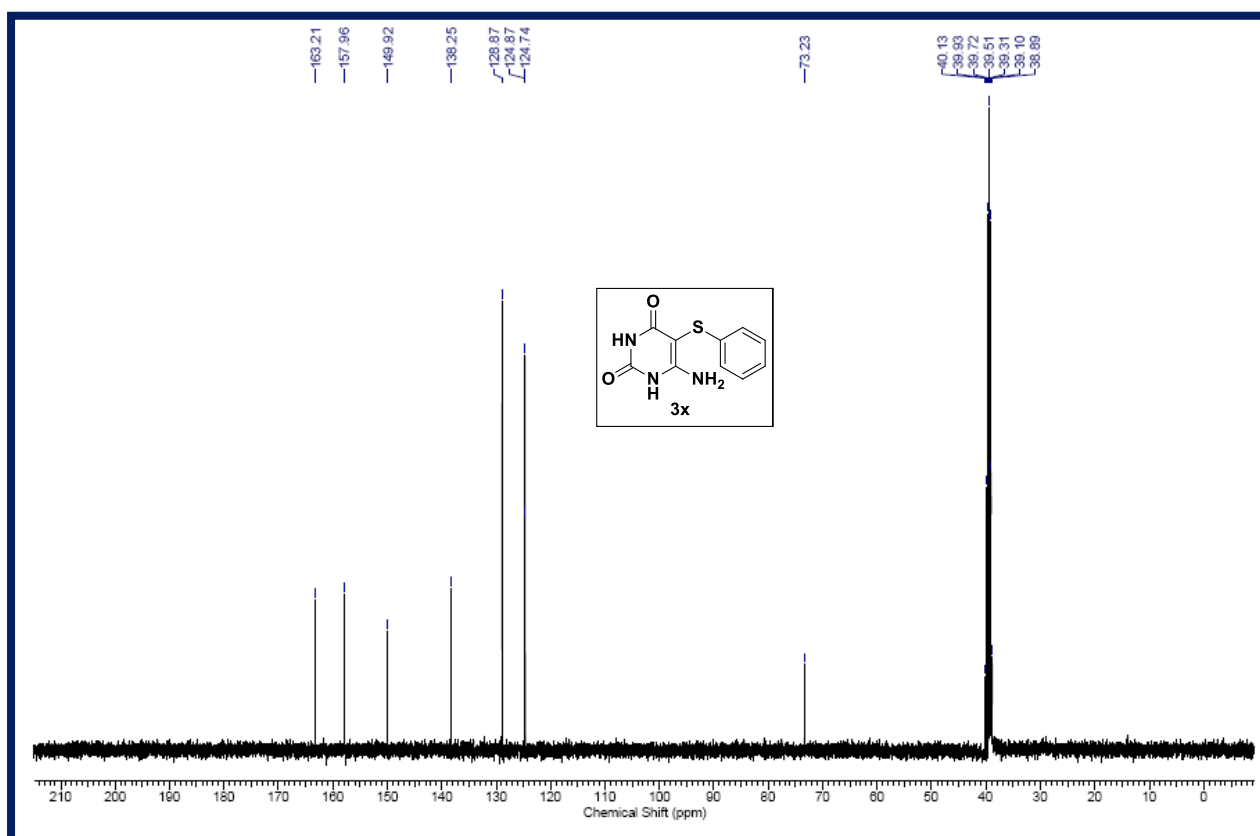

### <sup>1</sup>H NMR 4a

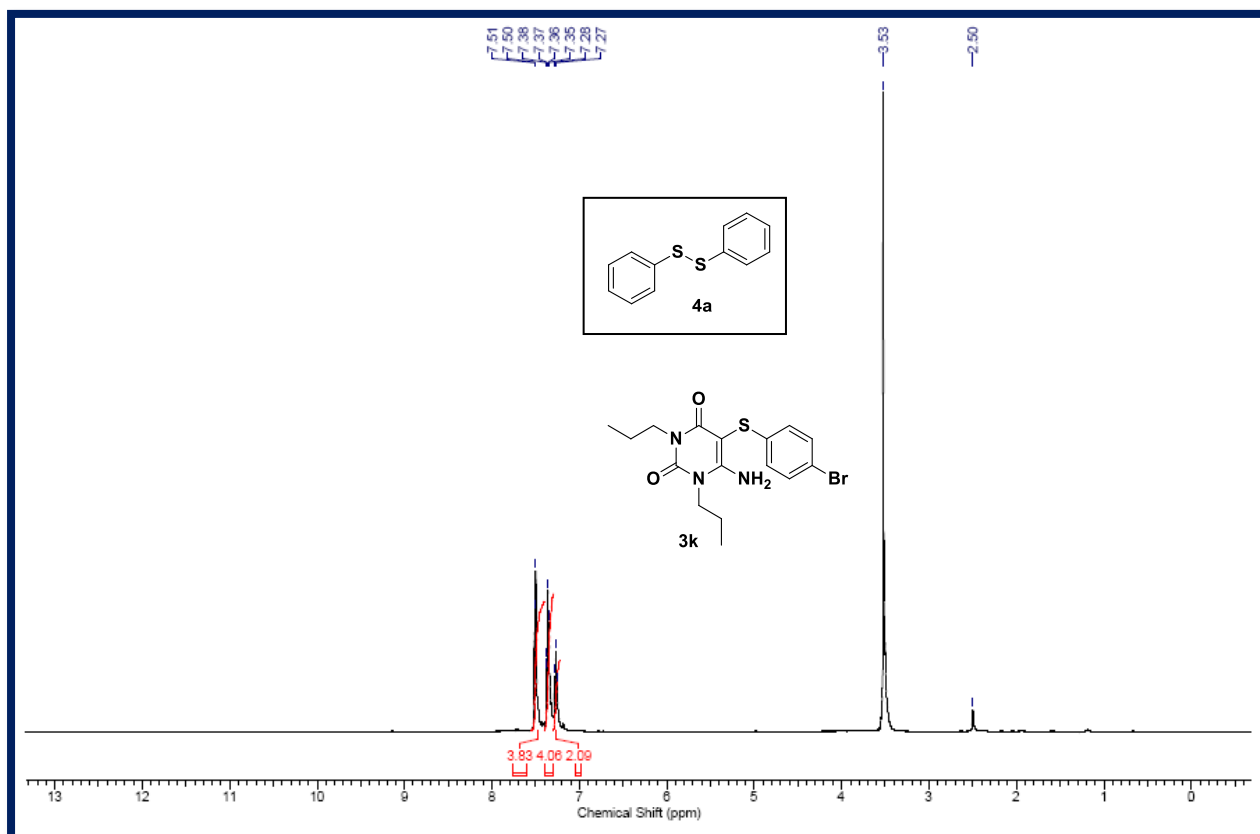

### <sup>13</sup>C NMR 4a

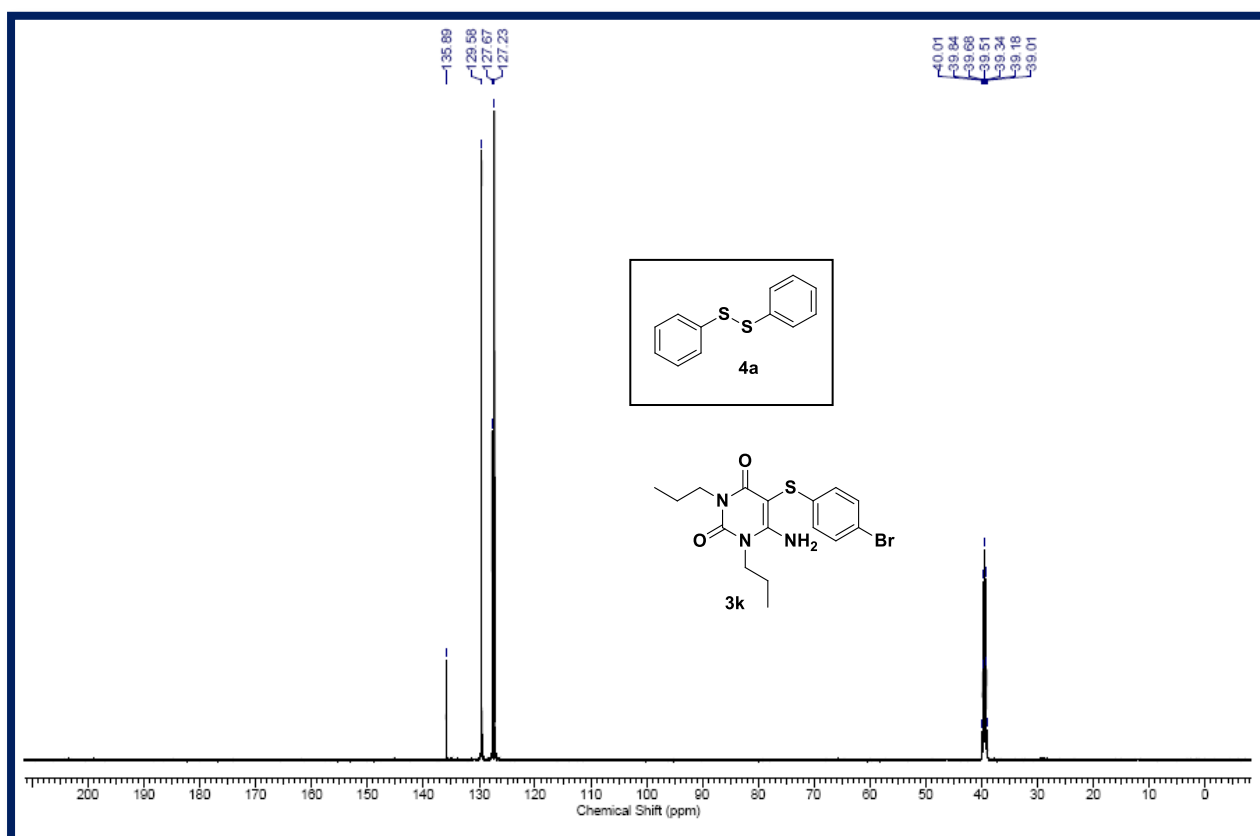

### <sup>1</sup>H NMR 4b

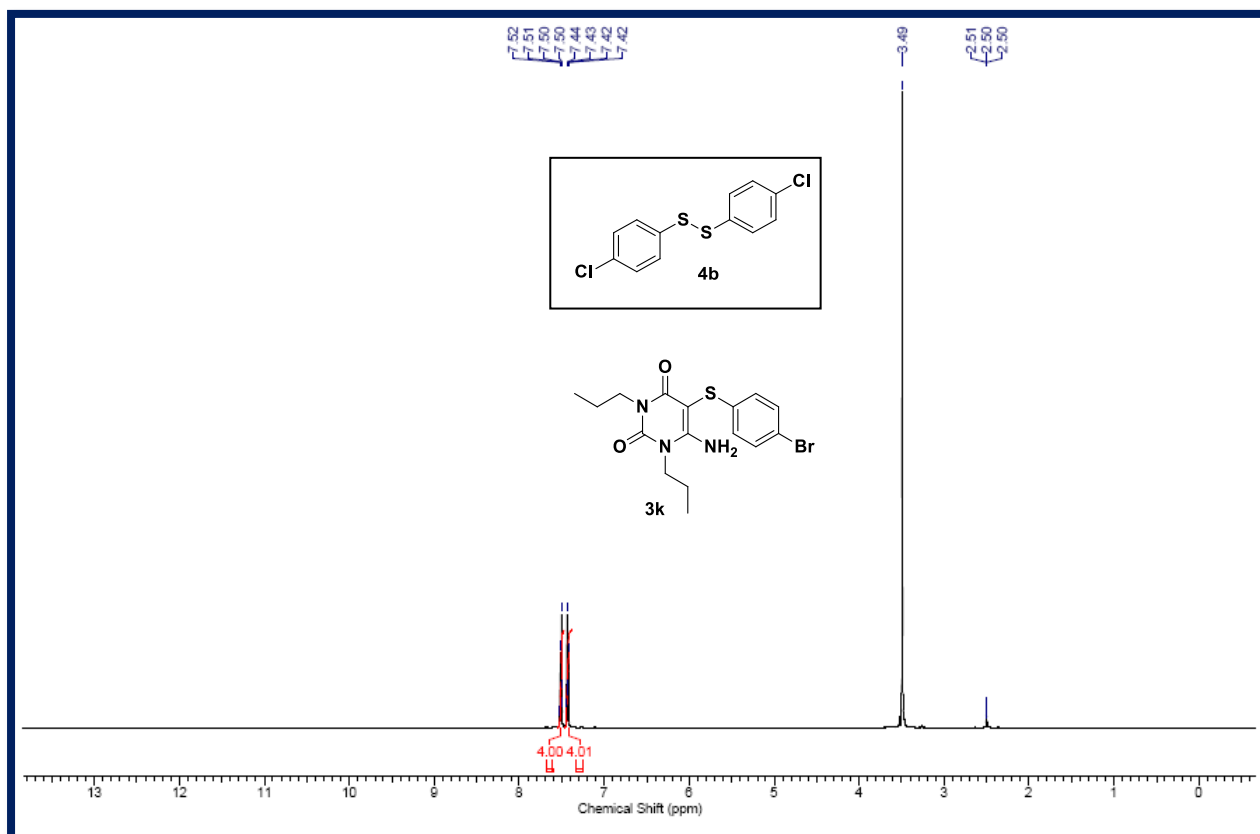

### <sup>13</sup>C NMR 4b

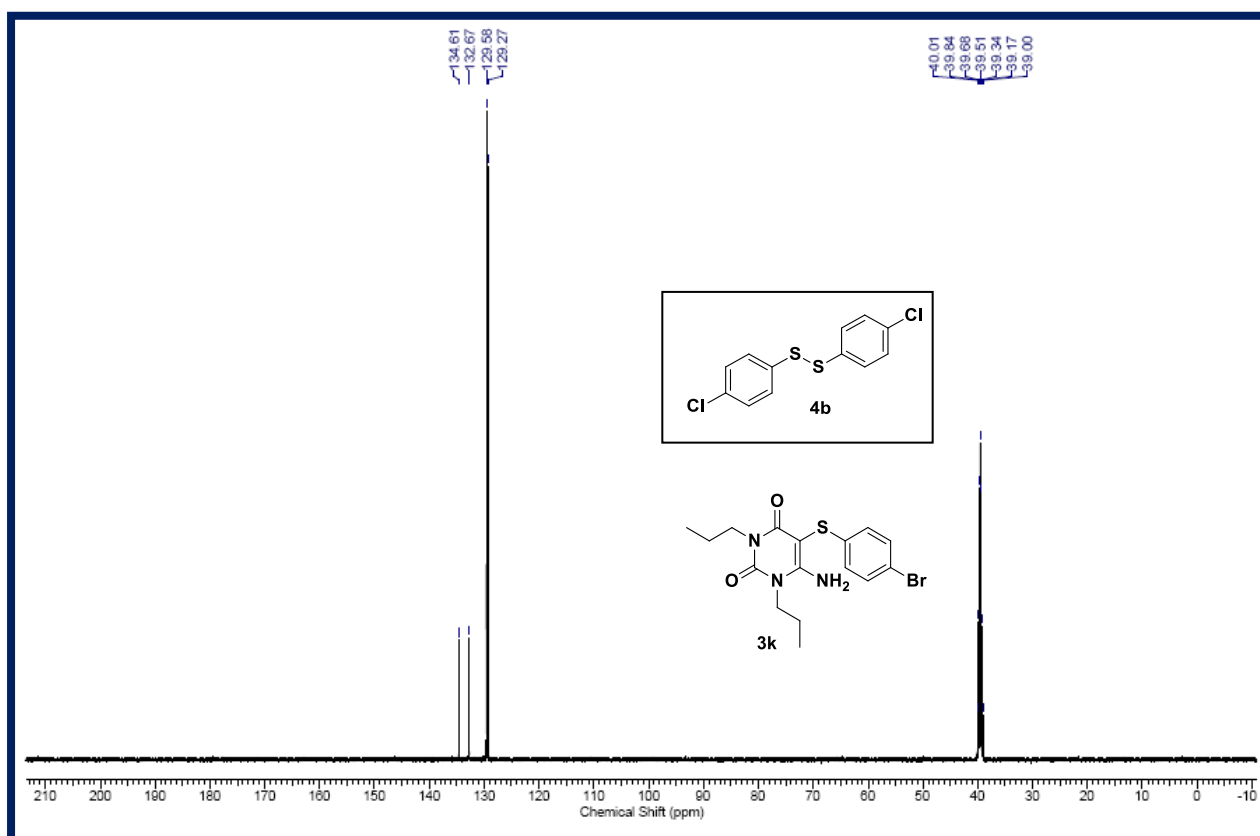



### <sup>1</sup>H NMR 4d

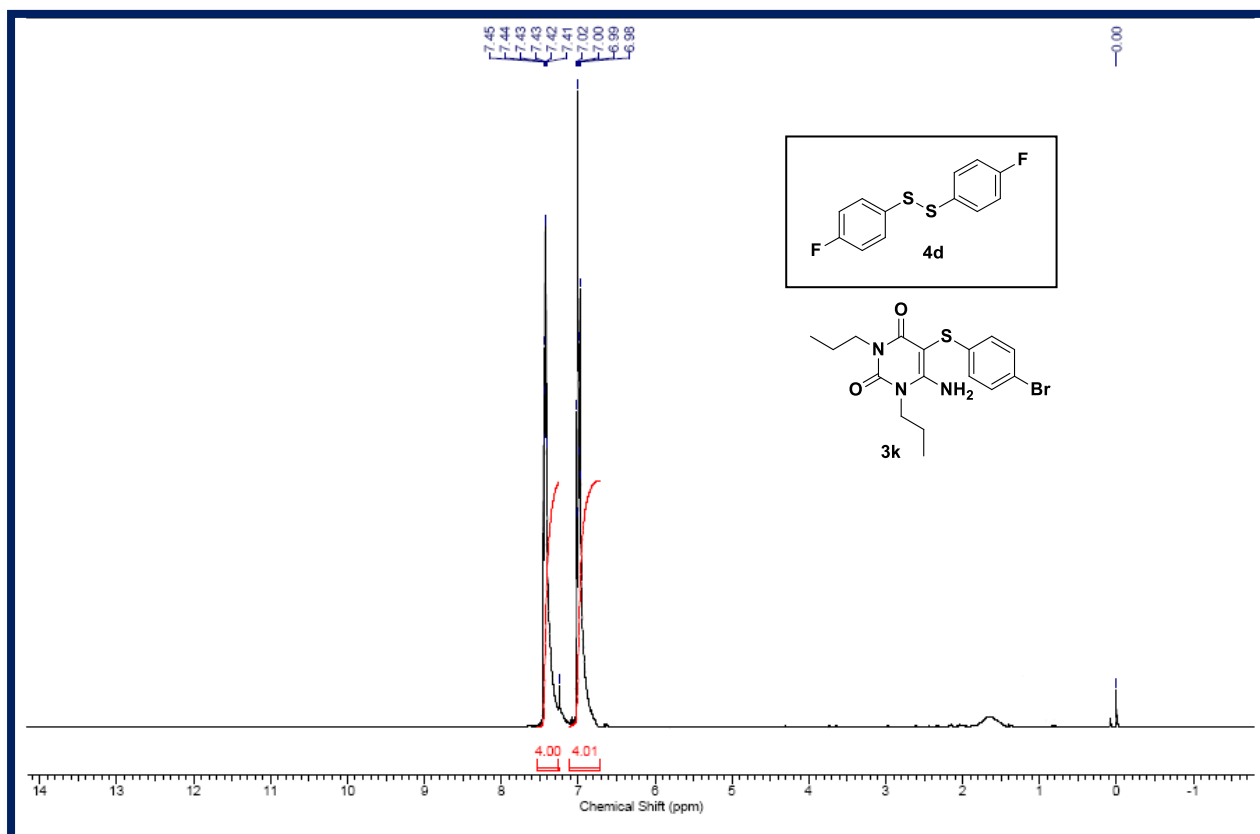

### <sup>13</sup>C NMR 4d

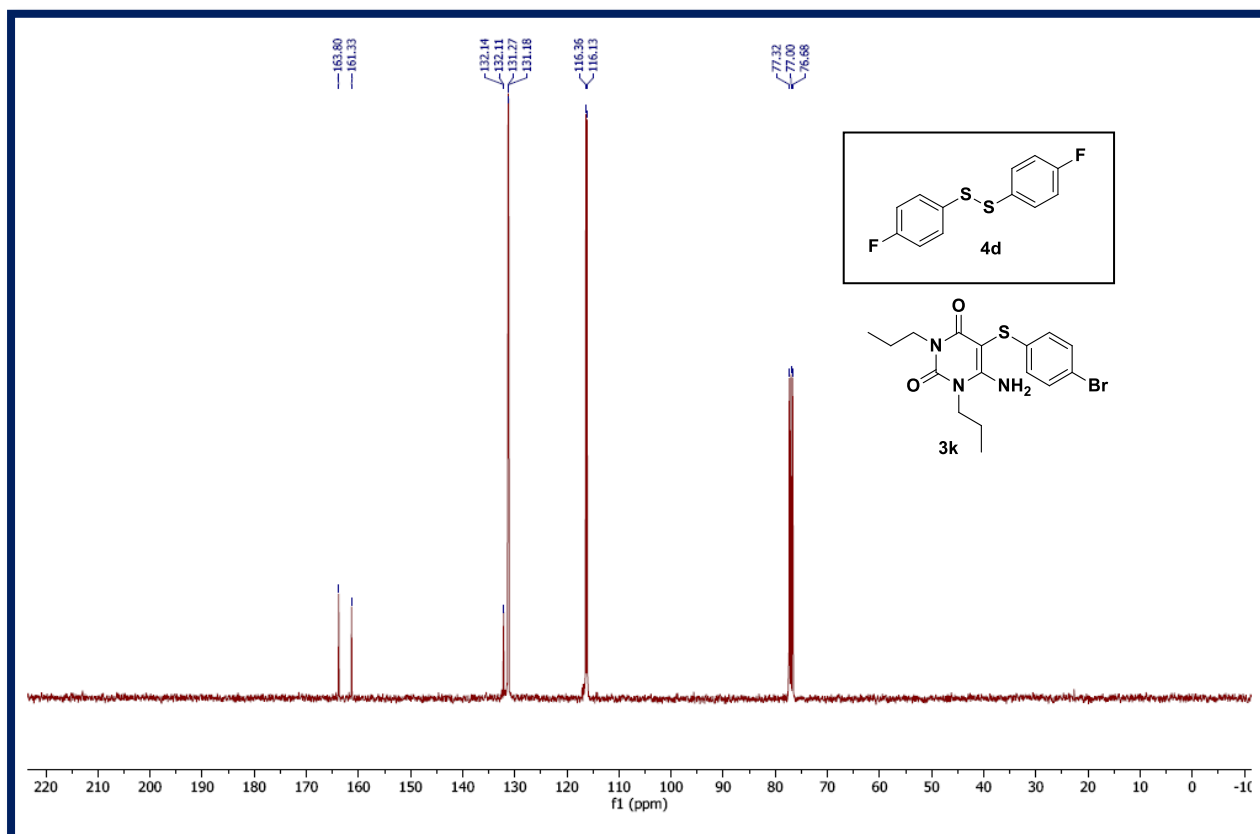

Supplement: d2nj01941h1.pdf [file d2nj01941h1.pdf]
